# Supplementary material for: High-resolution quantitative trait locus mapping for rice grain quality traits using genotyping by sequencing
Source: Front Plant Sci. 2023 Jan 12;13:1050882. doi: 10.3389/fpls.2022.1050882 (PMC9878556; doi:10.3389/fpls.2022.1050882)
Supplement: Supplementary file 1 [file Table_1.xlsx]

## Sheet: Sheet1
Supplemental Table 1. Statistical summary of barcodes, raw reads, mapped reads, and reference genome alignment rate of each F2 plant derived from a cross between Koshihikari and Nona Bokra
NO.	Samples	Barcodes	Raw reads	Mapped reads	Alignment rate
1	F2-1	AACAA	2471088	2224226	0.9001
2	F2-2	CCACT	2808781	2545036	0.9061
3	F2-4	GGTGA	1148615	1036050	0.902
4	F2-5	AATCT	2394162	2159534	0.902
5	F2-6	CCGAG	2882805	2609803	0.9053
6	F2-7	TTAGA	1977351	1809276	0.915
7	F2-8	GGCTT	1459323	1329589	0.9111
8	F2-9	ACATG	2399311	2160099	0.9003
9	F2-10	CACCG	1657535	1487471	0.8974
10	F2-11	TGTAT	1224535	1062406	0.8676
11	F2-12	GTGAA	1310057	1156256	0.8826
12	F2-13	ACCGT	2209327	1997894	0.9043
13	F2-14	CAATA	2857720	2619100	0.9165
14	F2-15	GTTCG	1033741	891188	0.8621
15	F2-16	TAGGT	2567508	2391890	0.9316
16	F2-17	AGACA	2215340	2027922	0.9154
17	F2-18	CGTTG	2645040	2422063	0.9157
18	F2-19	CTCAT	2583293	2376371	0.9199
19	F2-20	TCTGG	2821411	2572844	0.9119
20	F2-21	TCGCA	2570782	2323215	0.9037
21	F2-22	GAAGG	2242124	2043247	0.9113
22	F2-23	ATCACG	1531870	1352028	0.8826
23	F2-24	AGGTCA	2157067	1955812	0.9067
24	F2-25	GAATCA	2836756	2551094	0.8993
25	F2-26	CCTACG	1458433	1316964	0.903
26	F2-27	TTGCCA	1828794	1612996	0.882
27	F2-28	TACGCG	2379812	2183239	0.9174
28	F2-29	GGTACA	1662051	1499003	0.9019
29	F2-31	CTCTAG	2129038	1956160	0.9188
30	F2-32	TGAGCA	1944102	1769327	0.9101
31	F2-33	GAGCTA	4463369	4002302	0.8967
32	F2-34	ACCTGG	2179769	1989475	0.9127
33	F2-35	CTTGAA	1742619	1546051	0.8872
34	F2-36	TGGACG	2275518	2091201	0.919
35	F2-37	GACTTG	2186272	1987977	0.9093
36	F2-38	ACTAGA	2177405	1994067	0.9158
37	F2-39	CTACCG	2163025	1964891	0.9084
38	F2-40	TCGGAA	2429291	2227659	0.917
39	F2-41	GGCTAA	2590047	2338553	0.9029
40	F2-42	AATCCG	2434797	2213960	0.9093
41	F2-43	CTAAGA	2474714	2293069	0.9266
42	F2-44	CAGGTG	3077900	2842748	0.9236
43	F2-45	GGTCAG	1578693	1368884	0.8671
44	F2-46	ATCGTA	2597420	2342093	0.9017
45	F2-47	TCAAGG	2258978	1994903	0.8831
46	F2-48	GCGTGA	2511902	2322002	0.9244
47	F2-49	AGTCTA	3091257	2836537	0.9176
48	F2-50	CAGTAA	1856377	1671110	0.9002
49	F2-51	CGAATG	2074921	1937561	0.9338
50	F2-52	TTCTGA	2117462	1931972	0.9124
51	F2-53	ACTGAG	1982788	1840622	0.9283
52	F2-54	TAACAG	1613429	1481450	0.9182
53	F2-55	GCCATA	2533097	2344127	0.9254
54	F2-56	ATGCGG	1648618	1523323	0.924
55	F2-57	GATGCT	1718636	1530445	0.8905
56	F2-58	CAATGG	2012190	1812379	0.9007
57	F2-59	GTACAA	1577175	1404632	0.8906
58	F2-60	AGCGCT	2000383	1802145	0.9009
59	F2-61	CCAGTA	2216273	2016808	0.91
60	F2-62	GTGACT	2145595	1925886	0.8976
61	F2-63	TATCGA	1737076	1521157	0.8757
62	F2-64	GCATAG	3547842	3254790	0.9174
63	F2-65	TGCATT	2300430	2132958	0.9272
64	F2-66	TAGTCT	1551318	1420076	0.9154
65	F2-67	CGTAAT	1900759	1772837	0.9327
66	F2-69	TTCGAT	1727689	1539543	0.8911
67	F2-71	AACAGT	1158477	987601	0.8525
68	F2-73	GGACTT	2393682	2162212	0.9033
69	F2-74	ACAGGT	2297171	2049306	0.8921
70	F2-75	CTGCAT	1972750	1782576	0.9036
71	F2-76	GACCAT	2043961	1823622	0.8922
72	F2-77	TTACGT	2089448	1898890	0.9088
73	F2-78	CAAGAT	1526520	1388522	0.9096
74	F2-79	AGTTCCA	2815552	2569754	0.9127
75	F2-80	GTTACCA	2142218	1953060	0.9117
76	F2-81	TGCTTCA	2206689	1963070	0.8896
77	F2-82	ATGGCCA	3014816	2729011	0.9052
78	F2-83	TCTAGCA	1931462	1690029	0.875
79	F2-84	GGTGTCA	1804762	1633670	0.9052
80	F2-85	CAGTCCA	1762074	1575470	0.8941
81	F2-86	ACCTGCA	1815280	1597446	0.88
82	F2-87	TTGATCA	2694864	2481161	0.9207
83	F2-88	CCTGCCA	2309122	2108921	0.9133
84	F2-89	GACATCA	1488015	1318678	0.8862
85	F2-90	TGTCACA	1778653	1594918	0.8967
86	F2-91	GTCGGCA	2475978	2257101	0.9116
87	F2-92	AGGCTCA	2678009	2468053	0.9216
88	F2-93	GCATCCA	2018501	1763160	0.8735
89	F2-94	AATGACA	1953285	1764792	0.9035
90	F2-95	CTAAGCA	2116499	1883684	0.89
91	F2-96	TACGCCA	1560105	1353079	0.8673
92	F2-97	TCGTACA	3095949	2785425	0.8997
93	F2-98	AGCATGA	2608848	2325005	0.8912
94	F2-99	GATTGCA	3057043	2674606	0.8749
95	F2-100	CTGCCAA	2724341	2420304	0.8884
96	F2-101	AGAATCG	2928802	2641779	0.902
97	F2-102	CCTCAGA	3273703	2970230	0.9073
98	F2-103	TTCTCAG	2202095	1919786	0.8718
99	F2-104	TGAGGCA	2614285	2323053	0.8886
100	F2-105	GAGCTGA	2332824	1980101	0.8488
101	F2-107	CTTACGG	2810202	2442065	0.869
102	F2-108	TAGCGCA	3333199	2991212	0.8974
103	F2-109	GGCGTAG	2513465	2243518	0.8926
104	F2-110	ACATAGA	1871071	1597707	0.8539
105	F2-111	CGTAGCG	2295913	2039918	0.8885
106	F2-112	GTAGCAA	2749371	2427969	0.8831
107	F2-113	AAGTACG	2346232	2073834	0.8839
108	F2-114	CCGATGA	2876599	2552981	0.8875
109	F2-115	TTCCGAA	2504127	2167321	0.8655
110	F2-116	AGTGCGG	2444098	2082860	0.8522
111	F2-117	GAACTCG	2707323	2373510	0.8767
112	F2-118	CTCAAGA	2169730	1891787	0.8719
113	F2-119	TCTTGAG	2994553	2620233	0.875
114	F2-120	TCGGCAA	3547150	3160155	0.8909
115	F2-121	GGATACG	2640254	2326591	0.8812
116	F2-122	AATACGA	2717687	2434504	0.8958
117	F2-123	ATCCTCG	2395815	2133712	0.8906
118	F2-124	CGTGGAA	2705387	2454597	0.9073
119	F2-125	GAGTCGG	2872918	2598554	0.9045
120	F2-126	GTACACA	3041255	2757505	0.9067
121	F2-127	CCGGTAG	2530721	2223491	0.8786
122	F2-128	TACAGGA	2428570	2131313	0.8776
123	F2-129	TGCAACG	2525748	2205230	0.8731
124	F2-130	ACAGTCA	1962625	1683735	0.8579
125	F2-131	CTTCGAG	1730316	1450696	0.8384
126	F2-132	TGGTCGA	2885737	2563111	0.8882
127	F2-133	GACTCAA	3761730	3448754	0.9168
128	F2-134	ACTAACG	2376430	2055374	0.8649
129	F2-135	CTACTGA	2443036	2077313	0.8503
130	F2-136	TGGCGAG	1366570	1226496	0.8975
131	F2-137	GATGCCG	3378423	3036526	0.8988
132	F2-138	CTGTGGA	3387318	3003873	0.8868
133	F2-139	GCCATGG	2518814	2161646	0.8582
134	F2-140	ATAGACG	3143077	2790109	0.8877
135	F2-141	CGAATAA	1808438	1622168	0.897
136	F2-142	AATCGAA	1811642	1521598	0.8399
137	F2-143	TCGGAGG	1963806	1634672	0.8324
138	F2-144	GGCTAGA	2902379	2573249	0.8866
139	F2-145	CTATCCG	2909556	2566228	0.882
140	F2-146	AACGTAA	2785305	2428785	0.872
141	F2-147	TCGACCG	6125758	5450086	0.8897
142	F2-149	AATTCAG	3449454	3145212	0.9118
143	F2-150	TCACGGA	3227117	2896014	0.8974
144	F2-151	CTGAACG	2541632	2249090	0.8849
145	F2-152	CACGTCG	3127595	2792316	0.8928
146	F2-153	TGACCAA	2700846	2364590	0.8755
147	F2-154	GCTATAA	1914924	1652962	0.8632
148	F2-155	GTCGAGG	2231203	1915934	0.8587
149	F2-156	ACGAGTA	2697137	2376447	0.8811
150	F2-157	TAATGCG	2744700	2408199	0.8774
151	F2-158	ATCTCGA	2857768	2531410	0.8858
152	F2-159	GGTCAAG	2317432	2026362	0.8744
153	F2-160	CAGGTTA	3274818	2957488	0.9031
154	F2-161	TCACACG	3279252	2891644	0.8818
155	F2-162	CGCTGAG	3343421	3058561	0.9148
156	F2-163	GAGACTA	3490573	3101723	0.8886
157	F2-164	TCTGTGA	2382661	2034315	0.8538
158	F2-165	ATACCAG	3162290	2757516	0.872
159	F2-166	AGCGATA	2348900	2047536	0.8717
160	F2-168	GCTTAGG	3276853	2960964	0.9036
161	F2-169	CAATGAA	2892085	2533755	0.8761
162	F2-170	ATCAGCT	2462724	2169167	0.8808
163	F2-171	TATCCGG	2406025	2157242	0.8966
164	F2-172	TTCGTTA	2556446	2246093	0.8786
165	F2-173	CGGTAGG	2842491	2574159	0.9056
166	F2-174	GCAAGCT	3034866	2681607	0.8836
167	F2-175	GTGCTAG	3148753	2836396	0.9008
168	F2-176	TGTGCTA	1985529	1686905	0.8496
169	F2-177	ACGTTAA	1687144	1436265	0.8513
170	F2-178	AGACGCT	2137942	1833712	0.8577
171	F2-179	CATGAGG	2235149	1945473	0.8704
172	F2-180	GGCACCT	3003261	2657885	0.885
173	F2-181	ATACGTA	3110517	2812840	0.9043
174	F2-182	CACTTGA	2442136	2089491	0.8556
175	F2-183	TGTACAG	3037666	2695624	0.8874
176	F2-184	GTGGACCA	3101262	2791756	0.9002
177	F2-185	ACAATGCA	2760941	2444537	0.8854
178	F2-186	CACTGACA	2591058	2257847	0.8714
179	F2-187	TCTGACCA	2831757	2515166	0.8882
180	F2-188	GTGCCTCA	2199053	1924391	0.8751
181	F2-189	AACTAGCA	2100822	1853555	0.8823
182	F2-190	CCAAGTCA	2072691	1794121	0.8656
183	F2-191	TTGCTACA	2613182	2306394	0.8826
184	F2-192	GGTGTCCA	2305348	2025478	0.8786
185	F2-193	AACGCTCA	828417	701089	0.8463
186	F2-194	CCATAGCA	1425415	1259069	0.8833
187	F2-195	TTGAGCCA	780615	672890	0.862
188	F2-196	GGTCCACA	1127227	1004471	0.8911
189	F2-197	AATACGCA	958233	883490	0.922
190	F2-198	CCGCATCA	888129	794253	0.8943
191	F2-199	TTATGACA	1080103	929968	0.861
192	F2-200	ATCGTCCA	1018910	911516	0.8946
193	F2-201	GGAACTCA	1548234	1407809	0.9093
194	F2-202	CACGTGCA	1045044	957678	0.9164
195	F2-203	TCTCGACA	920614	804708	0.8741
196	F2-204	AGGTACCA	1329887	1181870	0.8887
197	F2-205	GAACATCA	563942	447375	0.7933
198	F2-206	CCTGCACA	1026613	890689	0.8676
199	F2-207	TTCATGCA	607075	503750	0.8298
200	F2-208	GAGTGCCA	838797	730424	0.8708
201	F2-209	AGACTACA	1339865	1234149	0.9211
202	F2-210	CTCGATCA	1287551	1180040	0.9165
203	F2-211	TCGACGCA	1143411	1018779	0.891
204	F2-212	GGTTGTCA	1044171	925135	0.886
205	F2-213	AATCGCCA	1253177	1132496	0.9037
206	F2-214	CCGATACA	1227199	1103497	0.8992
207	F2-215	TGAGAGCA	1002161	858952	0.8571
208	F2-216	GTCTCACA	812027	690304	0.8501
209	F2-217	AAGATCCA	951419	824499	0.8666
210	F2-218	CTACGGCA	1093094	962578	0.8806
211	F2-219	TGCTATCA	861206	725393	0.8423
212	F2-220	GTTGCGCA	1063935	924985	0.8694
213	F2-221	TCGTTCCA	1003502	886895	0.8838
214	F2-222	AATGAACA	1009923	876714	0.8681
215	F2-223	CGCCGTCA	975614	905077	0.9277
216	F2-224	GTAATCCA	848635	735851	0.8671
217	F2-225	ACGTCACA	1483330	1311560	0.8842
218	F2-226	CATCAGCA	1281175	1132943	0.8843
219	F2-227	TCAGCTCA	1090016	948531	0.8702
220	F2-228	CGTAGCCA	1222552	1120591	0.9166
221	F2-229	GACATACA	871220	753169	0.8645
222	F2-230	ACCTGTCA	1170020	988315	0.8447
223	F2-231	ATGCAGCA	1521823	1361727	0.8948
224	F2-232	TAAGTCCA	1000947	872225	0.8714
225	F2-234	GCCAATCA	1135745	1013538	0.8924
226	F2-235	TGGCGGCA	1596917	1465969	0.918
227	F2-236	ATAGCACA	1358468	1191512	0.8771
228	F2-237	GATAACCA	1275296	1130294	0.8863
229	F2-238	CTGTTGCA	1161481	1014089	0.8731
230	F2-239	TGCGGCCA	946924	851379	0.8991
231	F2-240	ACTCCTCG	1477548	1311176	0.8874
232	F2-241	GAATTGCA	931073	816644	0.8771
233	F2-242	CCTAACCG	1135333	980360	0.8635
234	F2-243	ATCCGACA	1381189	1250114	0.9051
235	F2-244	TAGGCTCG	1035391	924707	0.8931
236	F2-245	GGAAGCTA	1021492	914031	0.8948
237	F2-246	CCTCCAAG	1738327	1594045	0.917
238	F2-247	TTCTAGGA	1205198	1088655	0.9033
239	F2-248	GAGGTTCA	1462458	1328204	0.9082
240	F2-249	AGAACCTG	1496448	1347850	0.9007
241	F2-250	CCTCTTGA	1079578	946789	0.877
242	F2-251	TTCTAACG	1655419	1514873	0.9151
243	F2-252	CGGTGGAA	2196984	1956853	0.8907
244	F2-253	GAAGACTG	886854	768192	0.8662
245	F2-254	ACCATAAG	1152238	1045425	0.9073
246	F2-255	TTGCCGGA	1894928	1730258	0.9131
247	F2-256	AGTGGTCG	1663293	1534387	0.9225
248	F2-257	GAACCATA	1736560	1605797	0.9247
249	F2-258	CCTAAGGA	1407419	1281173	0.9103
250	F2-259	TTCTTCAG	1707906	1522256	0.8913
251	F2-260	AGGAGTCA	1437386	1275823	0.8876
252	F2-261	GAAGCTAG	1979195	1826005	0.9226
253	F2-262	CCTCAGTG	1443543	1313912	0.9102
254	F2-263	TTCGTAGA	1387509	1259025	0.9074
255	F2-264	ACGTGCCG	2565878	2358555	0.9192
256	F2-265	GGACAGTA	1346817	1203919	0.8939
257	F2-267	TGTTGCGA	1659558	1520155	0.916
258	F2-268	GTGGTACG	1189711	1048492	0.8813
259	F2-269	AACATTGA	1336298	1199060	0.8973
260	F2-270	CCACGATA	1621065	1472251	0.9082
261	F2-271	TTGTCGAG	1546115	1372486	0.8877
262	F2-272	GGTTACCG	1357653	1237908	0.9118
263	F2-273	AACGACTA	1925850	1754834	0.9112
264	F2-274	CCAACTGG	1725912	1576448	0.9134
265	F2-275	TGTCTGAA	1161226	1043709	0.8988
266	F2-276	CTAGGACG	1386251	1200909	0.8663
267	F2-277	GAGACCTA	1324306	1158502	0.8748
268	F2-278	ACCTATAG	1618673	1477362	0.9127
269	F2-279	GTTCTAGA	1598975	1426765	0.8923
270	F2-280	TAGAGGCG	1846817	1694639	0.9176
271	F2-281	AGAGCTTA	1474543	1310573	0.8888
272	F2-282	CCTTAAGG	2008040	1820288	0.9065
273	F2-283	TTCCGCAA	1287705	1110001	0.862
274	F2-284	GGAGTGCG	1639652	1444533	0.881
275	F2-285	AAGACTAA	1982799	1778967	0.8972
276	F2-286	CCTTGCTA	1313732	1169352	0.8901
277	F2-287	TTGCAAGG	1195874	1065404	0.8909
278	F2-288	GGCCTGCA	2332483	2089205	0.8957
279	F2-289	AACGACTCA	2458940	2215750	0.9011
280	F2-290	CCAACTGCA	1891483	1668098	0.8819
281	F2-291	TTGTTAACA	1552329	1354096	0.8723
282	F2-292	GGTAGGCCA	3189236	2899653	0.9092
283	F2-293	AACGCTACA	2659082	2467628	0.928
284	F2-294	CCACGATCA	3140853	2889898	0.9201
285	F2-295	TTGTACGCA	2065882	1795871	0.8693
286	F2-296	AGTGTGCCA	1391546	1198816	0.8615
287	F2-297	GAACACTCA	2107393	1852609	0.8791
288	F2-298	CCTATAGCA	1643191	1487252	0.9051
289	F2-299	TTCTCGCCA	1836831	1572143	0.8559
290	F2-301	GAAGATACA	3065522	2783493	0.908
291	F2-302	CCTCCGCCA	3220276	2926908	0.9089
292	F2-303	TTCTGCTCA	3412602	3164164	0.9272
293	F2-304	GAGGTAGCA	2290965	2039187	0.8901
294	F2-305	AGAACCTCA	2691475	2376572	0.883
295	F2-306	CCTCGTGCA	2688647	2426772	0.9026
296	F2-307	TTCGAACCA	1662952	1467056	0.8822
297	F2-308	AGGTTGACA	2121448	1851599	0.8728
298	F2-309	GAACCTCCA	1757550	1507626	0.8578
299	F2-310	CCTAAGTCA	1538195	1350073	0.8777
300	F2-311	TTCGTCACA	2534585	2173913	0.8577
301	F2-312	TGGAGAGCA	2116851	1870026	0.8834
302	F2-313	GAATAACCA	1795076	1519531	0.8465
303	F2-314	ACCTCCGCA	2748621	2472384	0.8995
304	F2-315	CTTCTGTCA	2884197	2623465	0.9096
305	F2-317	AGAGATCCA	2997650	2717369	0.9065
306	F2-318	CCTAGCACA	3175016	2910854	0.9168
307	F2-319	TTGGCATCA	2189975	1911848	0.873
308	F2-320	CGCTTGGCA	2475203	2225455	0.8991
309	F2-321	GAACTAACA	2227714	1957937	0.8789
310	F2-322	ACCAATGCA	1800676	1593598	0.885
311	F2-323	TGTTCCTCA	1962347	1690365	0.8614
312	F2-324	GTGTGGCCA	2680280	2355162	0.8787
313	F2-325	AACGTACCA	3105632	2833268	0.9123
314	F2-326	CCAGACTCA	2961192	2695869	0.9104
315	F2-327	TTGACTACA	3605284	3285134	0.9112
316	F2-328	GGTCCGGCA	2849605	2593425	0.9101
317	F2-329	AACAGATCA	3066306	2686390	0.8761
318	F2-330	CCATAGCCA	3008626	2684296	0.8922
319	F2-331	TTGCTTGCA	1993873	1729884	0.8676
320	F2-332	GGTGGCACA	2224014	1924661	0.8654
321	F2-333	AACCTTGCA	1860193	1644596	0.8841
322	F2-335	TTAACGTCA	1704116	1488034	0.8732
323	F2-336	GTGGACACA	2727644	2375232	0.8708
324	F2-337	AGAATAACA	2480598	2226088	0.8974
325	F2-338	CACCAGTCA	3049317	2742860	0.8995
326	F2-339	TCTTCTGCA	2874963	2615641	0.9098
327	F2-340	GGCGGTCCA	2849264	2580293	0.9056
328	F2-341	AAGATCACA	2894950	2574479	0.8893
329	F2-342	CCATGCGCA	3087952	2796140	0.9055
330	F2-343	TTGCAGCCA	2099633	1822691	0.8681
331	F2-344	GGTGCATCA	2484184	2197757	0.8847
332	F2-345	AACTAGCCA	1829630	1582629	0.865
333	F2-346	CCAGTTACA	2507307	2232756	0.8905
334	F2-347	TTGACAGGA	1065123	918349	0.8622
335	F2-348	AGTCGCTCA	2529446	2174311	0.8596
336	F2-349	GAACCATGA	2949771	2646239	0.8971
337	F2-350	CCTAACGAA	3421899	3084499	0.9014
338	F2-351	TGCTGTACA	3326055	3017729	0.9073
339	F2-352	GTGGTGCAA	3602670	3226190	0.8955
340	F2-353	AACACCTGA	3183388	2861547	0.8989
341	F2-354	CCTGATCCA	2446594	2166214	0.8854
342	F2-355	TTACTAGGA	1843859	1609320	0.8728
343	F2-356	GGATGGACA	2868126	2555213	0.8909
344	F2-357	AAGAACTAA	2286944	2037895	0.8911
345	F2-358	CCTCCAGAA	2228610	1985245	0.8908
346	F2-359	TTCTGTCGA	2215061	1950139	0.8804
347	F2-360	TGAGTGACA	2096576	1867000	0.8905
348	F2-361	GAGAATCCA	3151946	2869531	0.9104
349	F2-362	ACCTCGAGA	2157415	1940379	0.8994
350	F2-363	CTTCTCGAA	2976272	2738765	0.9202
351	F2-364	GGCGGATAA	3210971	2937717	0.9149
352	F2-365	AAGACTCGA	3193617	2884474	0.9032
353	F2-366	CCGCTAACA	2003190	1760403	0.8788
354	F2-367	TTATACTGA	2099570	1840693	0.8767
355	F2-368	CGTGAGGAA	2325808	2078574	0.8937
356	F2-369	GAATGTTCA	1569455	1383945	0.8818
357	F2-370	ACCATACGA	2062092	1796082	0.871
358	F2-371	TTGCGCACA	2218794	1907940	0.8599
359	F2-372	GGTGCGGAT	2510600	2185728	0.8706
360	F2-373	AACACATAG	3315490	3015106	0.9094
361	F2-374	CCACATCGA	3459056	3163652	0.9146
362	F2-375	TGTTGCACT	3310963	3045754	0.9199
363	F2-376	ATGGTGGCA	3248271	2994256	0.9218
364	F2-377	GAACATAAG	2987244	2734821	0.9155
365	F2-378	CCTACACGA	2144619	1917074	0.8939
366	F2-379	TTCTTCTAG	2352828	2057548	0.8745
367	F2-380	GAGGAGGCT	2085873	1837862	0.8811
368	F2-381	AGAAGACGT	2849496	2489034	0.8735
369	F2-382	CCTCCTAAG	1909479	1691989	0.8861
370	F2-383	TTCTTCGGA	2008736	1750010	0.8712
371	F2-384	AGGAGGTCT	2502249	2217242	0.8861
