# Supplementary material for: High-resolution quantitative trait locus mapping for rice grain quality traits using genotyping by sequencing
Source: Front Plant Sci. 2023 Jan 12;13:1050882. doi: 10.3389/fpls.2022.1050882 (PMC9878556; doi:10.3389/fpls.2022.1050882)
Supplement: Supplementary file 2 [file Table_2.xlsx]

## Sheet: Sheet1
Supplemental Table 2. Summary of the high-density genetic map of Oryza sativa Koshihikari × Nona Bokra F2 population
Linkage group	Marker number	Binned marker number	Length (cM)	Average marker interval (cM)	Maximum interval (cM)	Number of interval with >10 cM
LG1	620	480	351.3	0.566613	15.6	5
LG2	235	198	251.8	1.07149	9.6	0
LG3	754	569	302.8	0.401592	14.3	3
LG4	134	106	207.2	1.54627	46.3	4
LG5	167	140	171.9	1.02934	26.6	3
LG6	450	356	238.7	0.530444	15.7	1
LG7	517	376	179.7	0.347582	9.5	0
LG8	246	203	165.9	0.67439	15.1	3
LG9	132	110	112.1	0.849242	10.1	1
LG10	138	102	85.7	0.621014	8.5	0
LG11	124	102	201.3	1.62339	46.5	3
LG12	313	242	188	0.600639	20.1	3
Total	3830	2984	2456.4	-	-	26
