# Supplementary material for: High-resolution quantitative trait locus mapping for rice grain quality traits using genotyping by sequencing
Source: Front Plant Sci. 2023 Jan 12;13:1050882. doi: 10.3389/fpls.2022.1050882 (PMC9878556; doi:10.3389/fpls.2022.1050882)
Supplement: Supplementary file 3 [file Table_3.xlsx]

## Sheet: Sheet1
Supplemental Table 3. Rice quality trait phenotypes for the Oryza sativa Koshihikari × Nona Bokra F2 population
Samples	WG (%)	HR (%)	AHR (%)	TP	CR (%)	CA (%)	DC (%)
F2-1	95.15	96.6	98.25	4	99.66	99.71	66.85
F2-2	88.27	90.38	94.89	5	91.49	91.96	37.59
F2-3	90.32	95.26	98.14	5	61.48	61.52	19.07
F2-4	67.12	70.14	82.58	4	35.91	35.98	11.48
F2-7	77.18	79.4	89.03	5	68.23	68.07	26.2
F2-10	78.73	82.41	91.43	5	95.55	95.86	49.65
F2-11	97.22	99.07	99.48	5	84.11	84.46	33
F2-13	76.53	81.12	89.86	5	98.11	98.1	58.31
F2-14	90	91.79	96.12	5	98.05	98	46.24
F2-16	96.43	96.43	98	4	100	100	69.04
F2-22	87.31	89.55	95.56	5	75.83	75.68	37.41
F2-24	90.44	91.44	96.08	4	96.7	96.81	65.55
F2-29	91	92.02	96.14	4	98.52	98.57	61.81
F2-30	85	86.86	94.18	4	99.47	99.48	67.36
F2-31	82.38	88.02	94.64	4	99.77	99.74	70.57
F2-36	77.63	80.26	88.73	4	100	100	68
F2-37	55.17	57.05	72.61	4	100	100	73.76
F2-38	70.2	73.06	84.77	5	94.97	95.06	36.61
F2-39	84.21	86.84	93.39	5	96.97	97.22	50.27
F2-42	85.86	90.16	95.18	4	100	100	70.2
F2-43	91.89	92.79	97.52	3	100	100	77.41
F2-44	75.28	79.78	90.45	3	99.3	99.32	77.2
F2-45	91.89	93.69	96.82	5	100	100	57.54
F2-47	85.71	90.48	95.36	5	98.95	99.05	57.26
F2-49	79.75	82.95	91.87	5	58.24	58.28	20.44
F2-53	86.93	87.44	93.16	5	93.1	92.92	35.78
F2-56	68.85	78.69	88.23	5	100	100	68.11
F2-58	85.5	87.02	93.55	5	100	100	50.35
F2-65	81.82	85.86	93.38	5	98.82	98.96	57.3
F2-66	84.72	88.35	95.14	5	92.51	92.58	47.85
F2-72	14.22	15.95	34.85	3	100	100	77.32
F2-74	91.01	96.63	98.33	5	100	100	64.68
F2-77	92.59	95.47	97.67	3	99.35	99.41	69.19
F2-82	77.78	81.68	90.73	3	100	100	77.17
F2-85	88.64	91.53	96.32	5	68.89	68.78	24.78
F2-89	88.98	91.77	96.27	5	98.14	98.17	58.3
F2-90	78.83	82.94	91.39	4	98.96	98.97	64.67
F2-91	94.65	96.26	98.09	3	100	100	79.86
F2-92	86.03	89.3	94.34	4	99.02	99.11	70.95
F2-94	71.46	74.66	86.54	5	61.16	60.51	21.52
F2-98	94.44	95.24	98.34	3	100	100	74.01
F2-100	77.17	83.99	91.98	5	75	74.87	27.68
F2-101	89.14	93.32	96.82	3	100	100	78.43
F2-103	70.14	73.78	84.62	5	85.44	85.7	39.08
F2-104	71.94	72.55	84.52	5	99.45	99.44	61.56
F2-108	85.54	86.51	93.42	5	91.36	91.46	33.4
F2-113	90.61	94.48	97.73	4	98.25	98.32	64.46
F2-114	54.55	59.09	75.41	3	100	100	73.31
F2-116	95.82	98.17	99.27	3	100	100	77.23
F2-117	85.14	87.84	94.35	5	99.08	99.12	66.09
F2-118	85.26	88.42	94.06	5	98.81	98.76	49.1
F2-121	76.53	77.55	87.61	5	100	100	58.52
F2-123	88.08	93.4	96.83	5	43.62	43.33	16.15
F2-124	83.89	86.85	93.95	4	100	100	77.09
F2-125	85.45	90.18	95.78	5	80.24	80.7	31.45
F2-128	92.88	95.47	98.21	3	100	100	78.81
F2-129	92.73	94.11	97.15	5	79.54	79.44	36.6
F2-131	89.53	91.7	96.23	4	100	100	67.11
F2-132	92.31	94.87	97.28	5	100	100	64.71
F2-133	90.08	93.27	96.59	5	51.31	50.41	19.01
F2-139	93.01	93.99	97.11	4	21.54	21.6	6.5
F2-140	86.47	89.85	94.76	4	99.16	99.27	63.15
F2-143	82.22	85	92.29	5	92.59	92.77	48.58
F2-147	94.3	98.1	98.75	3	100	100	80.52
F2-155	93.57	94.29	97.14	5	93.94	94.14	37.05
F2-162	51.41	54.93	72.02	3	100	100	77.31
F2-170	90.81	93.29	96.95	3	99.24	99.29	69.49
F2-173	62.13	66.91	80.91	4	100	100	73.92
F2-177	61.07	64.8	80.1	5	81.07	80.41	35.8
F2-178	86.81	91.67	95.64	5	100	100	64.04
F2-179	59.19	64.57	79.3	5	95.83	95.18	52.12
F2-180	67	69	82.39	3	99.03	99.1	69.23
F2-181	93.89	96.33	98.86	5	94.92	94.89	52.53
F2-187	70.52	72.34	85.07	3	99.58	99.61	70.63
F2-188	89.41	91.44	95.93	5	61.33	61.7	17.59
F2-189	84.19	86.51	93.9	5	91.4	91.5	42.59
F2-193	90.44	92.65	96.62	3	100	100	77.91
F2-202	61.7	71.28	84.39	3	100	100	82.55
F2-203	59.37	64.75	79.48	3	100	100	79.86
F2-209	69.89	75.95	88.71	3	99.75	99.95	82.58
F2-213	80.3	84.85	93.25	4	100	100	76.3
F2-216	91.08	92.99	97.59	3	100	100	75.14
F2-219	97.26	98.63	99.17	3	100	100	73.07
F2-221	70.69	70.69	82.71	5	82.93	82.86	31.1
F2-224	73.89	74.78	85.73	3	99.41	99.38	70.68
F2-227	89.14	92.91	97.35	4	98.7	98.63	65.86
F2-229	70.2	74.24	85.04	4	100	100	70.03
F2-231	94.18	96.36	98	3	99.62	99.62	75.07
F2-234	73.77	79.14	88.63	5	89.08	89.21	46.04
F2-239	90.46	92.11	96.1	3	100	100	72.86
F2-240	53.89	55.23	70.85	3	99.03	99.02	66.92
F2-243	81.13	81.13	89.52	3	100	100	77.31
F2-245	53.74	58.43	73.47	5	70.83	70.08	24.81
F2-247	88.65	90.46	95.32	5	55.22	55.38	16.02
F2-249	92.08	93.44	96.96	5	80.41	80.69	36.41
F2-250	59.81	60.75	76.07	3	100	100	74.33
F2-252	94.5	97.48	98.73	5	32.42	32.28	9.11
F2-254	87.16	91.89	96.16	5	98.16	98.04	58
F2-256	85.1	90.31	95.79	5	42.15	41.52	14.23
F2-257	83.76	87.49	94.23	3	100	100	79.9
F2-258	61.65	68.71	80.71	5	98.63	98.88	63.81
F2-261	88.76	90.45	95.5	5	98.76	98.83	55.76
F2-262	90.73	92.38	97.17	3	100	100	77.03
F2-263	93.1	96.55	97.92	3	100	100	74.27
F2-272	88.37	91.69	95.91	3	99.64	99.65	68.3
F2-273	92.79	94.87	97.5	4	99.16	99.24	60.96
F2-274	91.01	93.26	96	5	100	100	52.97
F2-276	91.39	93.074	96.83	5	77.99	78.86	27.75
F2-277	91.53	94.63	97.78	5	71.43	71.1	26.27
F2-278	83.95	88.52	95.82	5	99.86	99.84	66.35
F2-279	93.22	94.92	97.96	5	100	100	64.44
F2-280	85.21	88.35	94.65	5	97.49	97.45	55.91
F2-281	90.57	93.59	97	5	96.58	96.61	56.72
F2-284	85.11	87.56	94.09	4	97.76	97.85	60.84
F2-286	87.71	93.02	97.02	2	100	100	83.62
F2-287	98.85	98.85	99.78	5	70.93	70.89	16.81
F2-292	94.35	94.35	97.43	5	99.15	99.19	60.17
F2-293	91.96	95.54	97.96	5	95.33	95.45	49.2
F2-294	94.69	95.77	98.18	3	28.28	28.81	7.46
F2-296	53.33	57.33	72.2	5	100	100	58.7
F2-298	66.53	73.52	85.84	5	78.79	78.69	32.88
F2-299	95.84	97.92	99.29	5	40.77	40.81	11.37
F2-300	64.29	67.73	80.42	4	54.53	54.65	19.38
F2-301	93.85	97.21	98.97	5	86.97	87.28	42.15
F2-303	94.12	97.39	98.7	5	94.63	94.67	47.96
F2-305	95	95	97.31	4	100	100	57.44
F2-307	94.13	95.41	97.88	5	77.54	78.26	24.79
F2-308	96.18	99.24	99.58	5	98.46	98.85	54.49
F2-311	93.9	94.92	97.59	3	100	100	81.36
F2-312	92.2	95.01	97.68	5	94.41	94.5	48.29
F2-314	70.85	74.49	85.39	3	100	100	79.15
F2-317	96.75	97.32	98.81	4	98.43	98.41	65.87
F2-318	88.64	93.59	97.26	4	99.21	99.22	71.59
F2-320	91.08	95.42	97.66	5	71.46	71.3	23.9
F2-321	86.67	90.67	95.27	5	80.88	80.47	30.04
F2-323	90.32	93.55	96.78	5	89.66	89.79	48.1
F2-324	90.57	96.52	98.53	5	43.1	42.32	12.07
F2-325	94.55	97.58	99.2	5	54.35	54.45	12.98
F2-326	61.95	62.83	76.83	4	100	100	69.74
F2-328	56.78	60.17	74.26	4	99.3	99.21	68.8
F2-331	49.67	52.31	68.19	5	89.71	89.8	45.05
F2-333	87.23	95.04	97.17	5	96.27	96.25	46.53
F2-337	93.12	96.51	98.69	4	98.29	98.37	64.96
F2-338	94.15	97.07	98.7	4	93.97	94.25	60.23
F2-340	46.08	48.04	65.35	5	62.76	62.61	17.27
F2-341	70.87	72.29	84.46	4	99.51	99.57	63.63
F2-343	94.99	96.2	98.21	5	98.74	98.79	56.29
F2-344	94.69	98.37	99.06	3	100	100	73.01
F2-345	85.59	92.37	95.71	5	97.25	97.32	50.14
F2-346	94.76	96.34	98.06	5	93.48	93.85	55.02
F2-348	68.75	68.75	82.45	5	93.94	94.17	43.72
F2-351	92.31	92.31	95.06	4	100	100	60.8
F2-352	82.19	85.62	92.25	4	98.4	98.57	65.11
F2-354	86.7	89.34	94.18	5	91.39	91.7	43.54
F2-356	85.63	93.2	96.97	5	68.13	66.96	27.82
F2-358	91.82	94.55	97.7	5	29.81	29.77	5.85
F2-360	73.13	76.72	86.92	4	64.04	64.18	20.6
F2-363	94.92	96.61	98.35	5	98.25	98.55	55.18
F2-364	82.54	92.86	95.91	5	83.33	82.74	42.24
F2-366	93.12	96.22	98.05	5	73.3	73.89	25.6
F2-367	87.68	89.66	94.45	3	98.9	98.97	69.08
F2-368	97.71	99.43	99.68	4	97.98	98.12	66.45
F2-371	93.29	93.6	96.77	3	99.35	99.39	71.42
F2-372	74.27	78.13	87.56	4	99.89	99.88	72.04
F2-373	93.24	97.54	98.78	4	24.88	25.28	6.68
F2-378	88.67	92	95.84	3	100	100	79.9
F2-379	76.36	80	90.36	5	98.86	98.88	48.47
F2-380	93.08	95.6	97.65	4	99.34	99.44	71.62
F2-381	92.7	95.56	97.71	5	93.32	93.11	49.43
F2-382	94.15	95.85	98.21	5	88.58	89.02	42.42
F2-383	90.35	95.55	97.82	5	82.72	82.53	29.58
F2-384	91.08	93.12	96.73	5	65.24	65.87	20.26
