# Supplementary material for: High-resolution quantitative trait locus mapping for rice grain quality traits using genotyping by sequencing
Source: Front Plant Sci. 2023 Jan 12;13:1050882. doi: 10.3389/fpls.2022.1050882 (PMC9878556; doi:10.3389/fpls.2022.1050882)
Supplement: Supplementary file 4 [file Table_4.xlsx]

## Sheet: Sheet1
Supplemental Table 4. Genes within QTLs for rice quality traits with LOD values >4
Gene ID	Annotation
LOC_Os06g37840	resistance protein, putative, expressed
LOC_Os06g37850	transposon protein, putative, CACTA, En/Spm sub-class, expressed
LOC_Os06g37870	expressed protein
LOC_Os06g37880	expressed protein
LOC_Os06g37980	expressed protein
LOC_Os06g38040	retrotransposon protein, putative, unclassified, expressed
LOC_Os06g38050	transposon protein, putative, CACTA, En/Spm sub-class, expressed
LOC_Os06g38056	expressed protein
LOC_Os06g38062	transposon protein, putative, CACTA, En/Spm sub-class
LOC_Os06g38080	von Willebrand factor type A domain containing protein, putative, expressed
LOC_Os06g38100	S-locus-like receptor protein kinase, putative
LOC_Os06g38294	peptide transporter PTR2, putative, expressed
LOC_Os06g38310	expressed protein
LOC_Os06g38320	expressed protein
LOC_Os06g38410	retrotransposon protein, putative, Ty3-gypsy subclass, expressed
LOC_Os06g38460	expressed protein
LOC_Os06g38470	histone deacetylase 19, putative, expressed
LOC_Os06g38510	pectate lyase precursor, putative, expressed
LOC_Os06g38520	pectate lyase family protein, expressed
LOC_Os06g38550	expressed protein
LOC_Os06g38564	expressed protein
LOC_Os06g38580	expressed protein
LOC_Os06g38590	receptor-like protein kinase precursor, putative, expressed
LOC_Os06g38594	expressed protein
LOC_Os06g38640	receptor-like protein kinase precursor, putative, expressed
LOC_Os06g38650	receptor-like protein kinase precursor, putative, expressed
LOC_Os06g38670	receptor-like protein kinase precursor, putative, expressed
LOC_Os06g38680	expressed protein
LOC_Os06g38730	receptor-like protein kinase precursor, putative, expressed
LOC_Os06g38750	proline-rich family protein, putative, expressed
LOC_Os06g38764	expressed protein
LOC_Os06g38780	receptor-like protein kinase 2 precursor, putative, expressed
LOC_Os06g38790	ZmEBE protein, putative, expressed
LOC_Os06g38810	expressed protein
LOC_Os06g38830	receptor-like protein kinase precursor, putative, expressed
LOC_Os06g38850	expressed protein
LOC_Os06g38870	expressed protein
LOC_Os06g38880	hypothetical protein
LOC_Os06g38910	expressed protein
LOC_Os06g38930	leucine-rich repeat receptor protein kinase EXS precursor, putative, expressed
LOC_Os06g44190	expressed protein
LOC_Os06g44200	ZOS6-06 - C2H2 zinc finger protein, expressed
LOC_Os06g44210	protein phosphatase 2C, putative, expressed
LOC_Os06g44230	DNA-directed RNA polymerase 3A, chloroplast precursor, putative, expressed
LOC_Os06g44240	gp176, putative, expressed
LOC_Os06g44250	haemolysin-III, putative, expressed
LOC_Os06g44260	synthase, putative, expressed
LOC_Os06g44270	synthase, putative, expressed
LOC_Os06g44275	expressed protein
LOC_Os06g44300	WAX2, putative, expressed
LOC_Os06g44310	tetraspanin family protein, putative, expressed
LOC_Os06g44320	expressed protein
LOC_Os06g44350	hypothetical protein
LOC_Os06g44360	expressed protein
LOC_Os06g44370	WD domain, G-beta repeat domain containing protein, expressed
LOC_Os06g44374	protein transport protein SEC61 subunit gamma, putative, expressed
LOC_Os06g44380	ubiquitin carboxyl-terminal hydrolase family protein, expressed
LOC_Os06g44400	hypothetical protein
LOC_Os06g44410	histidine kinase, putative, expressed
LOC_Os06g44420	GDU1, putative, expressed
LOC_Os06g44430	protein kinase, putative, expressed
LOC_Os06g44450	CCT/B-box zinc finger protein, putative, expressed
LOC_Os06g44460	D-3-phosphoglycerate dehydrogenase, chloroplast precursor, putative, expressed
LOC_Os06g44470	pollen allergen, putative, expressed
LOC_Os06g44490	expressed protein
LOC_Os06g44500	OsFBK17 - F-box domain and kelch repeat containing protein, expressed
LOC_Os06g44510	hypothetical protein
LOC_Os06g44540	HOTHEAD precursor, putative, expressed
LOC_Os06g44550	expressed protein
LOC_Os06g44610	membrane associated DUF588 domain containing protein, putative, expressed
LOC_Os06g44620	AMP-binding domain containing protein, expressed
LOC_Os06g44630	expressed protein
LOC_Os06g44650	hypothetical protein
LOC_Os06g44660	fasciclin-like arabinogalactan precursor protein, putative, expressed
LOC_Os06g44670	expressed protein
LOC_Os06g44680	expressed protein
LOC_Os06g44740	retrotransposon protein, putative, unclassified, expressed
LOC_Os06g44750	AP2 domain containing protein, expressed
LOC_Os06g44760	expressed protein
LOC_Os06g44770	expressed protein
LOC_Os06g44780	expressed protein
LOC_Os06g44790	expressed protein
LOC_Os06g44810	expressed protein
LOC_Os06g44820	PPR repeat domain containing protein, putative, expressed
LOC_Os06g44840	prenyltransferase, putative, expressed
LOC_Os06g44860	OsSPL10 - SBP-box gene family member, expressed
LOC_Os06g44870	expressed protein
LOC_Os06g44880	type II intron maturase protein, putative, expressed
LOC_Os06g44890	villin protein, putative, expressed
LOC_Os06g44900	leaf senescence related protein, putative, expressed
LOC_Os06g44910	OsGrx_C4 - glutaredoxin subgroup I, expressed
LOC_Os06g44920	OsFBDUF34 - F-box and DUF domain containing protein, expressed
LOC_Os06g44930	expressed protein
LOC_Os06g44970	auxin efflux carrier component, putative, expressed
LOC_Os06g44980	expressed protein
LOC_Os06g45000	ubiquitin-conjugating enzyme, putative, expressed
LOC_Os06g45010	expressed protein
LOC_Os06g45020	STRUBBELIG-RECEPTOR FAMILY 3 precursor, putative, expressed
LOC_Os06g45050	clathrin assembly protein, putative, expressed
LOC_Os06g45060	expressed protein
LOC_Os06g45070	diphthamide biosynthesis protein 3, putative, expressed
LOC_Os06g45080	rabGAP/TBC domain-containing protein, putative, expressed
LOC_Os06g45090	expressed protein
LOC_Os06g45100	FAD binding domain of DNA photolyase domain containing protein, expressed
LOC_Os06g45110	DNA binding protein, putative, expressed
LOC_Os06g45120	ATP synthase, putative, expressed
LOC_Os06g45130	expressed protein
LOC_Os06g45140	bZIP transcription factor domain containing protein, expressed
LOC_Os06g45150	pollen allergen, putative, expressed
LOC_Os06g45160	pollen allergen, putative, expressed
LOC_Os06g45180	pollen allergen, putative, expressed
LOC_Os06g45190	pollen allergen, putative, expressed
LOC_Os06g45200	group 3 pollen allergen, putative, expressed
LOC_Os06g45210	pollen allergen, putative, expressed
LOC_Os06g45220	expressed protein
LOC_Os06g45230	pollen allergen, putative, expressed
LOC_Os06g45240	inactive receptor kinase At2g26730 precursor, putative, expressed
LOC_Os06g45250	tRNA pseudouridine synthase family protein, putative, expressed
LOC_Os06g45280	protein kinase APK1B, chloroplast precursor, putative, expressed
LOC_Os06g45290	pollen allergen, putative, expressed
LOC_Os06g45300	serine/threonine-protein kinase HT1, putative, expressed
LOC_Os06g45310	OsSPL11 - SBP-box gene family member, expressed
LOC_Os06g45320	DEFL27 - Defensin and Defensin-like DEFL family
LOC_Os06g45330	endonuclease V, putative, expressed
LOC_Os06g45340	peptidyl-prolyl cis-trans isomerase, FKBP-type, putative, expressed
LOC_Os06g45350	protein kinase domain containing protein, expressed
LOC_Os06g45360	peptidase, M24 family protein, putative, expressed
LOC_Os06g45370	fructose-1,6-bisphosphatase, putative, expressed
LOC_Os06g45380	vacuolar-sorting receptor precursor, putative, expressed
LOC_Os06g45390	expressed protein
LOC_Os06g45410	MYB family transcription factor, putative, expressed
LOC_Os06g45420	expressed protein
LOC_Os06g45430	cell cycle control protein, putative, expressed
LOC_Os06g45440	haloacid dehalogenase-like hydrolase domain-containing protein 3, putative, expressed
LOC_Os06g45450	glucan endo-1,3-beta-glucosidase 12 precursor, putative, expressed
LOC_Os06g45460	OsFBX202 - F-box domain containing protein, expressed
LOC_Os06g45470	expressed protein
LOC_Os06g45480	hydrolase, putative, expressed
LOC_Os06g45490	expressed protein
LOC_Os06g45500	copper-transporting ATPase, putative, expressed
LOC_Os06g45510	thioredoxin, putative, expressed
LOC_Os06g45540	zinc-binding protein, putative, expressed
LOC_Os06g45570	VQ domain containing protein, putative, expressed
LOC_Os06g45580	RING-H2 finger protein, putative, expressed
LOC_Os06g45590	glyceraldehyde-3-phosphate dehydrogenase, putative, expressed
LOC_Os06g45600	expressed protein
LOC_Os06g45610	expressed protein
LOC_Os06g45620	expressed protein
LOC_Os06g45630	expressed protein
LOC_Os06g45830	expressed protein
LOC_Os06g45960	cytochrome P450, putative, expressed
LOC_Os06g45990	patellin-5, putative, expressed
LOC_Os06g46090	expressed protein
LOC_Os06g46140	expressed protein
LOC_Os06g46149	serine/arginine repetitive matrix protein 1, putative, expressed
LOC_Os06g46160	expressed protein
LOC_Os06g46190	hypothetical protein
LOC_Os06g46200	expressed protein
LOC_Os06g46210	expressed protein
LOC_Os06g46230	expressed protein
LOC_Os07g05450	sulfotransferase domain containing protein, expressed
LOC_Os07g05460	flavonol sulfotransferase, putative, expressed
LOC_Os07g05470	AIR9 protein, putative, expressed
LOC_Os07g05480	photosystem I reaction center subunit, chloroplast precursor, putative, expressed
LOC_Os07g05480	photosystem I reaction center subunit, chloroplast precursor, putative, expressed
LOC_Os07g05500	expressed protein
LOC_Os07g05510	expressed protein
LOC_Os07g05520	hypothetical protein
LOC_Os07g05530	expressed protein
LOC_Os07g05550	expressed protein
LOC_Os07g05560	expressed protein
LOC_Os07g05570	ERD4 protein, putative, expressed
LOC_Os07g05580	ribosomal protein L7Ae, putative, expressed
LOC_Os07g05590	expressed protein
LOC_Os07g05610	zinc ion binding protein, putative, expressed
LOC_Os07g05610	zinc ion binding protein, putative, expressed
LOC_Os07g05620	CAMK_KIN1/SNF1/Nim1_like.28 - CAMK includes calcium/calmodulin depedent protein kinases, expressed
LOC_Os07g05630	OsGrx_C10 - glutaredoxin subgroup III, expressed
LOC_Os07g05640	transporter family protein, putative, expressed
LOC_Os07g05650	MAGE-8 antigen-related, putative, expressed
LOC_Os07g05660	expressed protein
LOC_Os07g05680	expressed protein
LOC_Os07g05720	TCP family transcription factor, putative, expressed
LOC_Os07g05810	glycine-rich protein, putative, expressed
LOC_Os07g05830	zinc-finger protein, putative, expressed
LOC_Os07g05890	expressed protein
LOC_Os07g05940	9-cis-epoxycarotenoid dioxygenase 1, chloroplast precursor, putative, expressed
LOC_Os07g06030	transposon protein, putative, CACTA, En/Spm sub-class, expressed
LOC_Os07g06390	expressed protein
LOC_Os07g06410	deoxyribonuclease tatD, putative, expressed
LOC_Os07g06530	expressed protein
LOC_Os07g06560	zinc finger, C3HC4 type domain containing protein, expressed
LOC_Os07g06680	fasciclin domain containing protein, expressed
LOC_Os07g06700	expressed protein
LOC_Os07g06710	tetratricopeptide repeat, putative, expressed
LOC_Os07g06730	OsFBX216 - F-box domain containing protein, expressed
LOC_Os07g06740	CAMK_CAMK_like.31 - CAMK includes calcium/calmodulin depedent protein kinases, expressed
LOC_Os07g06740	CAMK_CAMK_like.31 - CAMK includes calcium/calmodulin depedent protein kinases, expressed
LOC_Os07g06750	VQ domain containing protein, putative, expressed
LOC_Os07g06760	VQ domain containing protein, putative, expressed
LOC_Os07g06770	expressed protein
LOC_Os07g06790	VQ domain containing protein, putative, expressed
LOC_Os07g06800	3-oxo-5-alpha-steroid 4-dehydrogenase, putative, expressed
LOC_Os07g06810	expressed protein
LOC_Os07g06820	serine/threonine-protein kinase RIO-like, putative, expressed
LOC_Os07g06830	gibberellin receptor GID1L2, putative, expressed
LOC_Os07g06834	expressed protein
LOC_Os07g06840	gibberellin receptor GID1L2, putative, expressed
LOC_Os07g06850	gibberellin receptor GID1L2, putative, expressed
LOC_Os07g06860	gibberellin receptor GID1L2, putative, expressed
LOC_Os07g06880	gibberellin receptor GID1L2, putative, expressed
LOC_Os07g06890	FAD-linked oxidoreductase protein, putative, expressed
LOC_Os07g06900	OsFBLD3 - F-box, LRR and FBD domain containing protein, expressed
LOC_Os07g06940	valyl-tRNA synthetase, putative, expressed
LOC_Os07g06950	ubiquitin carboxyl-terminal hydrolase, putative, expressed
LOC_Os07g06960	pentatricopeptide, putative, expressed
LOC_Os07g06970	HEN1, putative, expressed
LOC_Os07g06980	histone deacetylase, putative, expressed
LOC_Os07g06980	histone deacetylase, putative, expressed
LOC_Os07g09450	heat shock protein DnaJ, putative, expressed
LOC_Os07g09460	expressed protein
LOC_Os07g09470	ATPase, putative, expressed
LOC_Os07g09480	ATPase, putative, expressed
LOC_Os07g09490	ATPase, putative, expressed
LOC_Os07g09500	expressed protein
LOC_Os07g09510	retrotransposon protein, putative, unclassified, expressed
LOC_Os07g09520	expressed protein
LOC_Os07g09530	ankyrin repeat family protein, putative, expressed
LOC_Os07g09560	ankyrin repeat family protein, putative, expressed
LOC_Os07g09570	hypothetical protein
LOC_Os07g09580	aminoacyl-tRNA synthetase, putative, expressed
LOC_Os07g09590	bHLH transcription factor, putative, expressed
LOC_Os07g09630	oxidoreductase, putative, expressed
LOC_Os07g09670	galactosyltransferase family protein, putative, expressed
LOC_Os07g09675	expressed protein
LOC_Os07g09680	ras-related protein, putative, expressed
LOC_Os07g09690	galactosyltransferase family protein, putative, expressed
LOC_Os07g09700	expressed protein
LOC_Os07g09710	OsFBX220 - F-box domain containing protein, expressed
LOC_Os07g09720	phosphoacetylglucosamine mutase, putative, expressed
LOC_Os07g09730	expressed protein
LOC_Os07g09740	no apical meristem protein, expressed
LOC_Os07g09750	expressed protein
LOC_Os07g09780	hypothetical protein
LOC_Os07g09800	expressed protein
LOC_Os07g09814	OsFBX221 - F-box domain containing protein, expressed
LOC_Os07g09830	no apical meristem protein, expressed
LOC_Os07g09840	expressed protein
LOC_Os07g09850	expressed protein
LOC_Os07g09860	no apical meristem protein, expressed
LOC_Os07g09870	OsFBA2 - F-box and FBA domain containing protein, expressed
LOC_Os07g09880	expressed protein
LOC_Os07g09890	hexokinase, putative, expressed
LOC_Os07g09900	disease resistance protein RPM1, putative, expressed
LOC_Os07g09910	stripe rust resistance protein Yr10, putative, expressed
LOC_Os07g09914	expressed protein
LOC_Os07g09940	NBS-LRR resistance protein, putative, expressed
LOC_Os07g09950	OsFBX222 - F-box domain containing protein, expressed
LOC_Os07g09960	expressed protein
LOC_Os07g09970	LTPL84 - Protease inhibitor/seed storage/LTP family protein precursor, expressed
LOC_Os07g09980	expressed protein
LOC_Os07g10030	expressed protein
LOC_Os07g10090	expressed protein
LOC_Os07g10110	expressed protein
LOC_Os07g10120	expressed protein
LOC_Os07g10130	squalene synthetase, putative, expressed
LOC_Os07g10139	expressed protein
LOC_Os07g10150	coatomer subunit gamma-2, putative, expressed
LOC_Os07g10160	glucosyltransferase, putative, expressed
LOC_Os07g10170	expressed protein
LOC_Os07g10180	expressed protein
LOC_Os07g10190	glucosyltransferase, putative, expressed
LOC_Os07g10200	expressed protein
LOC_Os07g10210	expressed protein
LOC_Os07g10220	anthocyanidin 3-O-glucosyltransferase, putative, expressed
LOC_Os07g10230	glucosyltransferase, putative, expressed
LOC_Os07g10240	anthocyanidin 3-O-glucosyltransferase, putative, expressed
LOC_Os07g10250	DEAD-box ATP-dependent RNA helicase 52B, putative, expressed
LOC_Os07g10254	expressed protein
LOC_Os07g10256	mitosis protein dim1, putative, expressed
LOC_Os07g10270	hypothetical protein
LOC_Os07g10290	expressed protein
LOC_Os07g10300	expressed protein
LOC_Os07g10310	expressed protein
LOC_Os07g10320	expressed protein
LOC_Os07g10330	expressed protein
LOC_Os07g10340	expressed protein
LOC_Os07g10350	S1 RNA binding domain containing protein, expressed
LOC_Os07g10920	expressed protein
LOC_Os07g10930	hypothetical protein
LOC_Os07g10940	exo70 exocyst complex subunit family protein, expressed
LOC_Os07g10950	expressed protein
LOC_Os07g10960	expressed protein
LOC_Os07g10970	leucine zipper protein-like, putative, expressed
LOC_Os07g10990	hypothetical protein
LOC_Os07g11000	structural constituent of ribosome, putative, expressed
LOC_Os07g11010	protein Kinase-associated protein phosphatase, putative, expressed
LOC_Os07g11020	rc - bHLH transcription factor regulating proanthocyanidin production in seeds, expressed
LOC_Os07g11050	IPP transferase, putative, expressed
LOC_Os07g11060	expressed protein
LOC_Os07g11070	DUF630/DUF632 domains containing protein, putative, expressed
LOC_Os07g11100	hypothetical protein
LOC_Os07g11110	NAD dependent epimerase/dehydratase family protein, putative, expressed
LOC_Os07g11120	hydrolase, NUDIX family, domain containing protein, expressed
LOC_Os07g11280	pentatricopeptide containing protein, putative, expressed
LOC_Os07g11290	expressed protein
LOC_Os07g11300	expressed protein
LOC_Os07g11310	LTPL166 - Protease inhibitor/seed storage/LTP family protein precursor, expressed
LOC_Os07g11320	RAL1 - Seed allergenic protein RA5/RA14/RA17 precursor, expressed
LOC_Os07g11330	RAL2 - Seed allergenic protein RA5/RA14/RA17 precursor, expressed
LOC_Os07g11360	RAL3 - Seed allergenic protein RA5/RA14/RA17 precursor, expressed
LOC_Os07g11370	expressed protein
LOC_Os07g11380	RAL4 - Seed allergenic protein RA5/RA14/RA17 precursor, expressed
LOC_Os07g11410	RAL5 - Seed allergenic protein RA5/RA14/RA17 precursor, expressed
LOC_Os07g11510	RAL6 - Seed allergenic protein RA5/RA14/RA17 precursor, expressed
LOC_Os07g11530	latency associated nuclear antigen, putative, expressed
LOC_Os07g11550.	expressed protein
LOC_Os07g11630	LTPL163 - Protease inhibitor/seed storage/LTP family protein precursor, expressed
LOC_Os07g11650	LTPL164 - Protease inhibitor/seed storage/LTP family protein precursor, expressed
LOC_Os07g11970	cytochrome P450, putative, expressed
LOC_Os07g11980	expressed protein
LOC_Os07g15370	metal transporter Nramp6, putative, expressed
LOC_Os07g15400	expressed protein
LOC_Os07g15410	expressed protein
LOC_Os07g15430	expressed protein
LOC_Os07g15440	alanyl-tRNA synthetase family protein, expressed
LOC_Os07g15460	metal transporter Nramp6, putative, expressed
LOC_Os07g15480	retrotransposon protein, putative, unclassified, expressed
LOC_Os07g15490	C2-BTB1 - Bric-a-Brac, Tramtrack, Broad Complex BTB domain with C2 subfamily conserved sequence, expressed
LOC_Os07g15500	expressed protein
LOC_Os07g15530	expressed protein
LOC_Os07g15540	ethylene receptor, putative, expressed
LOC_Os07g15570	pentatricopeptide, putative, expressed
LOC_Os07g15580	expressed protein
LOC_Os07g15590	expressed protein
LOC_Os07g15600	H-BTB6 - Bric-a-Brac, Tramtrack, Broad Complex BTB domain with H family conserved sequence, expressed
LOC_Os07g15610	hypothetical protein
LOC_Os07g15640	CRR4, putative, expressed
LOC_Os07g15650	expressed protein
LOC_Os07g15670	peroxiredoxin, putative, expressed
LOC_Os07g15680	phospholipase D, putative, expressed
LOC_Os07g15710	transposon protein, putative, unclassified, expressed
LOC_Os07g15770	CCT motif family protein, expressed
LOC_Os07g15800	transposon protein, putative, CACTA, En/Spm sub-class, expressed
LOC_Os07g15820	expressed protein
LOC_Os07g15860	expressed protein
LOC_Os07g15870	expressed protein
LOC_Os07g15880	mitochondrial prohibitin complex protein 2, putative, expressed
LOC_Os07g15910	expressed protein
LOC_Os07g15920	expressed protein
LOC_Os07g15930	legume lectins beta domain containing protein, expressed
LOC_Os07g15940	legume lectins beta domain containing protein, expressed
LOC_Os07g15950	expressed protein
LOC_Os07g15980	expressed protein
LOC_Os07g16030	expressed protein
LOC_Os07g16040	erythronate-4-phosphate dehydrogenase domain containing protein, expressed
LOC_Os07g16070	retrotransposon protein, putative, unclassified, expressed
LOC_Os07g16130	acetyltransferase, GNAT family, putative, expressed
LOC_Os07g16140	FAD binding protein, putative, expressed
LOC_Os07g16150	expressed protein
LOC_Os07g16180	hypothetical protein
LOC_Os07g16210	expressed protein
LOC_Os07g16260	expressed protein
LOC_Os07g16330	expressed protein
LOC_Os07g16364	expressed protein
LOC_Os07g16380	expressed protein
LOC_Os07g16420	OsFBX232 - F-box domain containing protein, expressed
LOC_Os07g16600	expressed protein
LOC_Os07g16740	expressed protein
LOC_Os07g16760	expressed protein
LOC_Os07g1679	expressed protein
LOC_Os07g16800	OsFBX233 - F-box domain containing protein, expressed
LOC_Os07g16820	expressed protein
LOC_Os07g16890	transposon protein, putative, CACTA, En/Spm sub-class, expressed
LOC_Os07g16930	expressed protein
LOC_Os07g16950	Mak16 protein domain containing protein, expressed
LOC_Os07g16960	glycosyl transferase, group 1 domain containing protein, expressed
LOC_Os07g16970	rab GDP dissociation inhibitor alpha, putative, expressed
LOC_Os07g16980	expressed protein
LOC_Os07g17000	expressed protein
LOC_Os07g17010	chalcone synthase, putative, expressed
LOC_Os07g17040	Mak16 protein domain containing protein, expressed
LOC_Os07g17120	late embryogenesis abundant protein, putative, expressed
LOC_Os07g17130	FYVE zinc finger domain containing protein, expressed
LOC_Os07g17160	expressed protein
LOC_Os07g17170	expressed protein
LOC_Os07g17180	no apical meristem protein, expressed
LOC_Os07g17184	expressed protein
LOC_Os07g17210	FAS1, putative, expressed
LOC_Os07g17220	disease resistance protein, putative, expressed
LOC_Os07g17230	WRKY123, expressed
LOC_Os07g17250	disease resistance RPP13-like protein 1, putative, expressed
LOC_Os07g17280	Ser/Thr protein phosphatase family protein, putative, expressed
LOC_Os07g17300	expressed protein
LOC_Os07g17310	B12D protein, putative, expressed
LOC_Os07g17320	expressed protein
LOC_Os07g17330	B12D protein, putative, expressed
LOC_Os07g17360	transposon protein, putative, unclassified, expressed
LOC_Os07g17380	hypothetical protein
LOC_Os07g17400	zinc finger, RING-type, putative, expressed
LOC_Os07g17410	hypothetical protein
LOC_Os07g17420	expressed protein
LOC_Os07g17430	expressed protein
LOC_Os07g17450	expressed protein
LOC_Os07g17460	OsFBL36 - F-box domain and LRR containing protein, expressed
LOC_Os07g17470	hypothetical protein
LOC_Os07g17520	expressed protein
LOC_Os07g17540	transposon protein, putative, CACTA, En/Spm sub-class, expressed
LOC_Os07g17550	hypothetical protein
LOC_Os07g17560	expressed protein
LOC_Os07g17680	ribosomal RNA apurinic site specific lyase, putative
LOC_Os07g17689	expressed protein
LOC_Os07g17740	expressed protein
LOC_Os07g17770	tryptophanyl-tRNA synthetase, cytoplasmic, putative, expressed
LOC_Os07g17860	retrotransposon protein, putative, unclassified, expressed
LOC_Os07g17900	hypothetical protein
LOC_Os07g17970	AMP-binding domain containing protein, expressed
LOC_Os07g17990	retrotransposon protein, putative, unclassified, expressed
LOC_Os07g18040	expressed protein
LOC_Os07g18050	RNA-binding motif protein, putative, expressed
LOC_Os07g18070	expressed protein
LOC_Os07g18100	conserved hypothetical protein
LOC_Os07g18110	expressed protein
LOC_Os07g18120	aldehyde oxidase, putative, expressed
LOC_Os07g18130	expressed protein
LOC_Os07g18154	aldehyde oxidase 4, putative, expressed
LOC_Os07g18158	aldehyde oxidase, putative, expressed
LOC_Os07g18162	aldehyde oxidase, putative, expressed
LOC_Os07g18200	retrotransposon protein, putative, unclassified, expressed
LOC_Os07g18230	lectin-like receptor kinase, putative, expressed
LOC_Os07g18240	lectin-like receptor kinase, putative, expressed
LOC_Os07g18250	expressed protein
LOC_Os07g18260	hypothetical protein
LOC_Os07g18300	expressed protein
LOC_Os07g18460	expressed protein
LOC_Os07g18480	hypothetical protein
LOC_Os07g18510	OsFBLD5 - F-box, LRR and FBD domain containing protein, expressed
LOC_Os07g18540	ribosomal RNA apurinic site specific lyase, putative, expressed
LOC_Os07g18550	hypothetical protein
LOC_Os07g18560	OsFBLD6 - F-box, LRR and FBD domain containing protein, expressed
LOC_Os07g18580	expressed protein
LOC_Os07g18590	expressed protein
LOC_Os07g18600	OsFBL37 - F-box domain and LRR containing protein, expressed
LOC_Os07g18610	OsFBLD7 - F-box, LRR and FBD domain containing protein, expressed
LOC_Os07g18630	expressed protein
LOC_Os07g18640	retrotransposon protein, putative, unclassified
LOC_Os07g18660	hypothetical protein
LOC_Os07g18670	expressed protein
LOC_Os07g18710	OsFBLD8 - F-box, LRR and FBD domain containing protein, expressed
LOC_Os07g18720	tetratricopeptide repeat containing protein, putative, expressed
LOC_Os07g18750	LTPL42 - Protease inhibitor/seed storage/LTP family protein precursor, expressed
LOC_Os07g18820	hypothetical protein
LOC_Os07g18860	expressed protein
LOC_Os07g18874	white-brown complex homolog protein 11, putative, expressed
LOC_Os07g18960	GCRP14 - Glycine and cysteine rich family protein precursor, putative, expressed
LOC_Os07g18990	LTPL40 - Protease inhibitor/seed storage/LTP family protein precursor, expressed
LOC_Os07g19000	LTPL41 - Protease inhibitor/seed storage/LTP family protein precursor, expressed
LOC_Os07g19030	tic22-like family domain containing protein, expressed
LOC_Os07g19040	glycosyl hydrolase, putative, expressed
LOC_Os07g19050	expressed protein
LOC_Os07g19060	transport protein particle component, Bet3, domain containing protein, expressed
LOC_Os07g19070	prefoldin, putative, expressed
LOC_Os07g19080	expressed protein
LOC_Os07g19130	cytochrome P450, putative, expressed
LOC_Os07g19160	expressed protein
LOC_Os07g19170	expressed protein
LOC_Os07g19190	ribosomal protein L24, putative, expressed
LOC_Os07g19210	cytochrome P450, putative, expressed
LOC_Os07g19220	expressed protein
LOC_Os07g19290	expressed protein
LOC_Os07g19320	stripe rust resistance protein Yr10, putative, expressed
LOC_Os07g19330	expressed protein
LOC_Os07g19350	hypothetical protein
LOC_Os07g19390	UBX domain-containing protein, putative, expressed
LOC_Os07g19400	pentatricopeptide domain containing protein, putative, expressed
LOC_Os07g19410	expressed protein
LOC_Os07g19444	regulatory protein, putative, expressed
LOC_Os07g19460	mitochondrial carrier protein, putative, expressed
LOC_Os07g19470	uncharacterized ACR, YggU family COG1872 containing protein, expressed
LOC_Os07g19494	expressed protein
LOC_Os07g19520	expressed protein
LOC_Os07g19530	peptidase, putative, expressed
LOC_Os07g19540	expressed protein
LOC_Os07g19550	expressed protein
LOC_Os07g19560	TATA-binding protein-associated factor 2N, putative, expressed
LOC_Os07g19570	expressed protein
LOC_Os07g20100	expressed protein
LOC_Os07g20110	expressed protein
LOC_Os07g20120	expressed protein
LOC_Os07g20130	MATH domain containing protein, expressed
LOC_Os07g20150	expressed protein
LOC_Os07g20160	glycine-rich cell wall protein, putative, expressed
LOC_Os07g20164	expressed protein
LOC_Os07g20260	expressed protein
LOC_Os07g20270	expressed protein
LOC_Os07g20290	expressed protein
LOC_Os07g20300	retrotransposon protein, putative, unclassified, expressed
LOC_Os07g20310	expressed protein
LOC_Os07g20340	heavy metal-associated domain containing protein, expressed
LOC_Os07g20360	retrotransposon protein, putative, unclassified, expressed
LOC_Os07g20410	expressed protein
LOC_Os07g20420	tetratricopeptide-like helical, putative, expressed
LOC_Os07g20510	auxin efflux carrier, putative, expressed
LOC_Os07g20520	retrotransposon protein, putative, unclassified, expressed
LOC_Os07g20530	hypothetical protein
LOC_Os07g20544	aspartokinase, chloroplast precursor, putative, expressed
LOC_Os07g20580	DEAD-box ATP-dependent RNA helicase, putative, expressed
LOC_Os07g20610	TKL_IRAK_DUF26.2 - DUF26 kinases have homology to DUF26 containing loci, expressed
LOC_Os07g20630	retrotransposon protein, putative, unclassified, expressed
LOC_Os07g20640	hypothetical protein
LOC_Os07g20690	retrotransposon protein, putative, unclassified, expressed
LOC_Os07g20710	retrotransposon protein, putative, unclassified, expressed
LOC_Os07g20940	retrotransposon protein, putative, unclassified, expressed
LOC_Os07g21970	retrotransposon protein, putative, unclassified, expressed
LOC_Os07g22024	zinc finger family protein, putative, expressed
LOC_Os07g22110	retrotransposon, putative, centromere-specific, expressed
LOC_Os07g22120	expressed protein
LOC_Os07g22150	hypothetical protein
LOC_Os07g22220	F-box-like/WD repeat-containing protein TBL1XR1-A, putative, expressed
LOC_Os07g22224	expressed protein
LOC_Os07g22230	expressed protein
LOC_Os07g22240	expressed protein
LOC_Os07g22340	hypothetical protein
LOC_Os07g22350	glucose-6-phosphate 1-dehydrogenase, chloroplast precursor, putative, expressed
LOC_Os07g22360	expressed protein
LOC_Os07g22390	ankyrin repeat domain containing protein, expressed
LOC_Os07g22400	POLA3 - Putative DNA polymerase alpha complex subunit, expressed
LOC_Os07g22460	expressed protein
LOC_Os07g22510	expressed protein
LOC_Os07g22534	WD domain, G-beta repeat domain containing protein, expressed
LOC_Os07g22580	rhoGAP domain containing protein, expressed
LOC_Os07g22590	hAT dimerisation domain containing protein, expressed
LOC_Os07g22600	spermidine synthase, putative, expressed
LOC_Os07g22640	lipid binding protein, putative, expressed
LOC_Os07g22650	expressed protein
LOC_Os07g22660	expressed protein
LOC_Os07g22670	mTERF domain containing protein, expressed
LOC_Os07g22680	SKP1-like protein 1B, putative, expressed
LOC_Os07g22690	expressed protein
LOC_Os07g22700	tim44-like domain containing protein, expressed
LOC_Os07g22710	CAMK_CAMK_like.32 - CAMK includes calcium/calmodulin depedent protein kinases, expressed
LOC_Os07g22720	2-oxo acid dehydrogenases acyltransferase domain containing protein, expressed
LOC_Os07g22730	AP2 domain containing protein, expressed
LOC_Os07g22760	conserved hypothetical protein
LOC_Os07g22770	AP2 domain containing protein, expressed
LOC_Os07g22840	anaphase-promoting complex subunit 11, putative, expressed
LOC_Os07g22850	chalcone and stilbene synthases, putative, expressed
LOC_Os07g22860	transposon protein, putative, CACTA, En/Spm sub-class, expressed
LOC_Os07g22870	expressed protein
LOC_Os07g22890	expressed protein
LOC_Os07g22900	expressed protein
LOC_Os07g22910	expressed protein
LOC_Os07g22930	starch synthase, putative, expressed
LOC_Os07g22950	adenylate kinase isoenzyme 6, putative, expressed
LOC_Os07g23110	poly synthetase 1, putative, expressed
LOC_Os07g23120	expressed protein
LOC_Os07g23130	expressed protein
LOC_Os07g23150	transferase family protein, putative, expressed
LOC_Os07g23169	methyltransferase, putative, expressed
LOC_Os07g23190	lysine ketoglutarate reductase trans-splicing related 1, putative, expressed
LOC_Os07g23200	F-actin-capping protein subunit alpha, putative, expressed
LOC_Os07g23210	transposon protein, putative, unclassified, expressed
LOC_Os07g23230	retrotransposon protein, putative, unclassified, expressed
LOC_Os07g23244	ribosomal protein L23 family protein, putative, expressed
LOC_Os07g23260	expressed protein
LOC_Os07g23270	transposon protein, putative, CACTA, En/Spm sub-class, expressed
LOC_Os07g23340	male sterility protein, putative, expressed
LOC_Os07g23390	expressed protein
LOC_Os07g23410	fatty acid desaturase, putative, expressed
LOC_Os07g23430	fatty acid desaturase, putative, expressed
LOC_Os07g23450	ZOS7-04 - C2H2 zinc finger protein, expressed
LOC_Os07g23470	thaumatin, putative, expressed
LOC_Os07g23494	expressed protein
LOC_Os07g23510	expressed protein
LOC_Os07g23520	expressed protein
LOC_Os07g23550	expressed protein
LOC_Os07g23560	hypothetical protein
LOC_Os07g23570	cytochrome P450 72A1, putative, expressed
LOC_Os07g23580	expressed protein
LOC_Os07g23600	root cap protein, putative, expressed
LOC_Os07g23640	retrotransposon protein, putative, Ty3-gypsy subclass, expressed
LOC_Os07g23660	retrotransposon protein, putative, unclassified, expressed
LOC_Os07g23670	expressed protein
LOC_Os07g23690	root cap protein 1, putative, expressed
LOC_Os07g23700	retrotransposon protein, putative, unclassified, expressed
LOC_Os07g23710	cytochrome P450, putative, expressed
LOC_Os07g23720	B4-BTB4 - Bric-a-Brac, Tramtrack, Broad Complex BTB domain with B4 subfamily conserved sequence, expressed
LOC_Os07g23730	thaumatin, putative, expressed
LOC_Os07g23740	sterol 3-beta-glucosyltransferase, putative, expressed
LOC_Os07g23760	expressed protein
LOC_Os07g23770	expressed protein
LOC_Os07g23780	expressed protein
LOC_Os07g23790	expressed protein
LOC_Os07g23790	expressed protein
LOC_Os07g23800	ribosomal protein S5, C-terminal domain containing protein, expressed
LOC_Os07g23850	glycosyl hydrolase, putative, expressed
LOC_Os07g23860	expressed protein
LOC_Os07g23880	glycosyl hydrolase, family 31, putative, expressed
LOC_Os07g23890	OsFBDUF36 - F-box and DUF domain containing protein, expressed
LOC_Os07g23900	OsFBX234 - F-box domain containing protein, expressed
LOC_Os07g23910	hypothetical protein
LOC_Os07g23944	glycosyl hydrolase, family 31, putative, expressed
LOC_Os07g23990	tetratricopeptide repeat domain containing protein, putative, expressed
LOC_Os07g24000	AWPM-19-like membrane family protein, putative, expressed
LOC_Os07g24010	hypothetical protein
LOC_Os07g24030	hypothetical protein
LOC_Os07g24050	carboxyl-terminal proteinase, putative, expressed
LOC_Os07g24090	mTERF domain containing protein, expressed
LOC_Os07g24140	hypothetical protein
LOC_Os07g24150	expressed protein
LOC_Os07g24160	expressed protein
LOC_Os07g24170	expressed protein
LOC_Os07g24190	CESA3 - cellulose synthase, expressed
LOC_Os07g24200	expressed protein
LOC_Os07g24210	hypothetical protein
LOC_Os07g24230	integral membrane transporter family protein, putative, expressed
LOC_Os07g24320	retrotransposon protein, putative, unclassified, expressed
LOC_Os07g24350	homeobox domain containing protein, expressed
LOC_Os07g24560	retrotransposon protein, putative, unclassified, expressed
LOC_Os07g24830	thionin-like peptide, putative, expressed
LOC_Os07g25060	thionin-like peptide, putative, expressed
LOC_Os07g25370	myb-like DNA-binding domain containing protein, expressed
LOC_Os07g25380	expressed protein
LOC_Os07g25390	DRD1, putative, expressed
LOC_Os07g25410	peptidase, M24 family protein, putative, expressed
LOC_Os07g25420	26S proteasome non-ATPase regulatory subunit 8, putative, expressed
LOC_Os07g25430	photosystem I reaction center subunit IV A, chloroplast precursor, putative, expressed
LOC_Os07g25440	WD domain, G-beta repeat domain containing protein, expressed
LOC_Os07g25450	histone-lysine N-methyltransferase, putative, expressed
LOC_Os07g25460	ankyrin repeat domain containing protein, expressed
LOC_Os07g25480	expressed protein
LOC_Os07g25484	expressed protein
LOC_Os07g25490	expressed protein
LOC_Os07g25500	pentatricopeptide, putative, expressed
LOC_Os07g25530	expressed protein
LOC_Os07g25540	flavin monooxygenase, putative, expressed
LOC_Os07g25550	hAT dimerisation domain-containing protein, putative, expressed
LOC_Os07g25570	expressed protein
LOC_Os07g25580	expressed protein
LOC_Os07g25590	decarboxylase, putative, expressed
LOC_Os07g25600	expressed protein
LOC_Os07g25650	expressed protein
LOC_Os07g25660	expressed protein
LOC_Os07g25670	expressed protein
LOC_Os07g25680	protein kinase domain containing protein, expressed
LOC_Os07g25690	subtilisin N-terminal Region family protein, expressed
LOC_Os07g25700	expressed protein
LOC_Os07g25710	myb-like DNA-binding domain containing protein, expressed
LOC_Os07g25730	expressed protein
LOC_Os07g25740	expressed protein
LOC_Os07g25780	expressed protein
LOC_Os07g25790	expressed protein
LOC_Os07g25800	OsFBDUF37 - F-box and DUF domain containing protein, expressed
LOC_Os07g26000	OsFBX235 - F-box domain containing protein, expressed
LOC_Os07g26050	hypothetical protein
LOC_Os07g26060	expressed protein
LOC_Os07g26100	expressed protein
LOC_Os07g26110	membrane associated DUF588 domain containing protein, putative, expressed
LOC_Os07g26130	expressed protein
LOC_Os07g26150	MYB family transcription factor, putative, expressed
LOC_Os07g26160	hypothetical protein
LOC_Os07g26170	expressed protein
LOC_Os09g29670	white-brown complex homolog protein 11, putative, expressed
LOC_Os09g29710	beta-expansin precursor, putative, expressed
LOC_Os09g29740	beta-expansin precursor, putative, expressed
LOC_Os09g29750	ZOS9-15 - C2H2 zinc finger protein, expressed
LOC_Os09g29760	expressed protein
LOC_Os09g29780	expressed protein
LOC_Os09g29790	PPR repeat domain containing protein, putative, expressed
LOC_Os09g29800	expressed protein
LOC_Os09g29820	bZIP transcription factor domain containing protein, expressed
LOC_Os09g29825	pentatricopeptide, putative, expressed
LOC_Os09g29830	helix-loop-helix DNA-binding domain containing protein, expressed
LOC_Os09g29840	heat shock protein, putative, expressed
LOC_Os09g29850	expressed protein
LOC_Os09g29860	expressed protein
LOC_Os09g29870	expressed protein
LOC_Os09g29880	expressed protein
LOC_Os09g29890	phosphatidylinositol 3- and 4-kinase family protein, putative, expressed
LOC_Os09g29900	vegetative cell wall protein gp1 precursor, putative, expressed
LOC_Os09g29910	expressed protein
LOC_Os09g29930	transcription factor BIM2, putative, expressed
LOC_Os09g29940	auxin-independent growth promoter protein, putative, expressed
LOC_Os09g29950	OsPOP19 - Putative Prolyl Oligopeptidase homologue, expressed
LOC_Os09g29960	dof zinc finger domain containing protein, putative, expressed
LOC_Os09g29970	TMV-MP30 binding protein 2C, putative, expressed
LOC_Os09g30070	expressed protein
LOC_Os09g30130	CSLE6 - cellulose synthase-like family E, expressed
LOC_Os09g30140	expressed protein
LOC_Os09g30150	AGC_PVPK_like_kin82y.16 - ACG kinases include homologs to PKA, PKG and PKC, expressed
LOC_Os09g30160	zinc finger, C3HC4 type domain containing protein, expressed
LOC_Os09g30170	F-box protein interaction domain containing protein, expressed
LOC_Os09g30180	OsFBX331 - F-box domain containing protein, expressed
LOC_Os09g30190	receptor-like protein kinase 2 precursor, putative, expressed
LOC_Os09g30200	ATP binding protein, putative, expressed
LOC_Os09g30210	expressed protein
LOC_Os09g30220	disease resistance protein RPM1, putative, expressed
LOC_Os09g30240	phosphofructokinase, putative, expressed
LOC_Os09g30250	OsSub58 - Putative Subtilisin homologue, expressed
LOC_Os09g30260	expressed protein
LOC_Os09g30330	phosphatidylinositol transfer, putative, expressed
LOC_Os09g30350	expressed protein
LOC_Os09g30454	OsWAK87 - OsWAK receptor-like protein kinase, expressed
LOC_Os09g30474	BPI/LBP family protein At3g20270 precursor, putative, expressed
LOC_Os09g30486	fasciclin domain containing protein, expressed
LOC_Os09g30490	EF hand family protein, expressed
LOC_Os09g30506	EF hand family protein, expressed
LOC_Os09g30510	glucosyl transferase, putative, expressed
LOC_Os09g30980	UDP-glucoronosyl and UDP-glucosyl transferase domain containing protein, expressed
LOC_Os09g31000	EF hand family protein, expressed
LOC_Os09g31019	ubiquitin fusion protein, putative, expressed
LOC_Os09g31025	EF hand family protein, expressed
LOC_Os09g31031	ubiquitin family protein, putative, expressed
LOC_Os09g31040	EF hand family protein, putative, expressed
LOC_Os09g31050	cytosolic phospholipase A2 beta, putative, expressed
LOC_Os09g31060	expressed protein
LOC_Os09g31080	induced stolen tip protein TUB8, putative, expressed
LOC_Os09g31090	HECT-domain domain containing protein, expressed
LOC_Os09g31100	expressed protein
LOC_Os09g31120	pirin, putative, expressed
LOC_Os09g31130	citrate transporter, putative, expressed
LOC_Os09g31140	ZOS9-16 - C2H2 zinc finger protein, expressed
LOC_Os09g31160	glutamate receptor precursor, putative, expressed
LOC_Os09g31170	expressed protein
LOC_Os09g31180	ribosomal protein L6, putative, expressed
LOC_Os09g31190	slowmo homolog, putative, expressed
LOC_Os09g31200	AN1-like zinc finger domain containing protein, expressed
LOC_Os09g31210	AGC_PVPK_like_CDK8.1 - ACG kinases include homologs to PKA, PKG and PKC, expressed
LOC_Os09g31220	expressed protein
LOC_Os09g31230	expressed protein
LOC_Os09g31260	expressed protein
LOC_Os09g31270	polygalacturonase, putative, expressed
LOC_Os09g31280	OTU-like cysteine protease family protein, putative, expressed
LOC_Os09g31290	expressed protein
LOC_Os09g31300	helix-loop-helix DNA-binding domain containing protein, expressed
LOC_Os09g31310	acetyltransferase, GNAT family, putative, expressed
LOC_Os09g31330	hypothetical protein
LOC_Os09g31350	expressed protein
LOC_Os09g31360	expressed protein
LOC_Os09g31370	expressed protein
LOC_Os09g31390	transcription factor, putative, expressed
LOC_Os09g31400	ethylene-insensitive 3, putative, expressed
LOC_Os09g31410	Os9bglu29 - beta-glucosidase homologue, similar to Os4bglu12 exoglucanase, expressed
LOC_Os09g31420	Leucine rich repeat N-terminal domain containing protein, putative, expressed
LOC_Os09g31430	Os9bglu30 - beta-glucosidase, similar to Os4bglu12 exoglucanase, expressed
LOC_Os09g31434	expressed protein
LOC_Os09g31438	OsSPL17 - SBP-box gene family member, expressed
LOC_Os09g31442	expressed protein
LOC_Os09g31446	expressed protein
LOC_Os09g31450	polygalacturonase inhibitor 1 precursor, putative, expressed
LOC_Os09g31454	MYB family transcription factor, putative, expressed
LOC_Os09g31458	expressed protein
LOC_Os09g31462	expressed protein
LOC_Os09g31466	expressed protein
LOC_Os09g31470	AT hook motif domain containing protein, expressed
LOC_Os09g31478	auxin efflux carrier component, putative, expressed
LOC_Os09g31482	splicing factor U2AF, putative, expressed
LOC_Os09g31486	DnaK family protein, putative, expressed
LOC_Os09g31490	reductase, putative, expressed
LOC_Os09g31494	conserved hypothetical protein
LOC_Os09g31498	dihydroflavonol-4-reductase, putative, expressed
LOC_Os09g31502	dehydrogenase, putative, expressed
LOC_Os09g31506	dihydroflavonol-4-reductase, putative, expressed
LOC_Os09g31514	dihydroflavonol-4-reductase, putative, expressed
LOC_Os09g31518	cinnamoyl-CoA reductase, putative
LOC_Os09g31970	3-hydroxy-3-methylglutaryl-coenzyme A reductase, putative, expressed
LOC_Os09g31980	DC1 domain-containing protein, putative, expressed
LOC_Os09g31990	expressed protein
LOC_Os09g32000	expressed protein
LOC_Os09g32010	ternary complex factor MIP1, putative, expressed
LOC_Os09g32020	ubiquitin fusion degradation protein, putative, expressed
LOC_Os09g32025	uroporphyrinogen-III synthase, putative, expressed
LOC_Os09g32030	expressed protein
LOC_Os09g32040	no apical meristem protein, putative, expressed
LOC_Os09g32050	chaperone protein dnaJ 10, putative, expressed
LOC_Os09g32060	expressed protein
LOC_Os09g32080	CHIT13 - Chitinase family protein precursor, expressed
LOC_Os09g32090	methyl-binding domain protein MBD, putative, expressed
LOC_Os09g32095	expressed protein
LOC_Os09g32100	expressed protein
LOC_Os09g32120	expressed protein
LOC_Os09g32130	expressed protein
LOC_Os09g32140	expressed protein
LOC_Os09g32150	expressed protein
LOC_Os09g32160	expressed protein
LOC_Os09g32180	expressed protein
LOC_Os09g32190	tRNA-splicing endonuclease positive effector-related, putative, expressed
LOC_Os09g32200	mitochondrial carrier protein, putative, expressed
LOC_Os09g32210	pumilio-family RNA binding repeat containing protein, expressed
LOC_Os09g32220	pob, putative, expressed
LOC_Os09g32230	vignain precursor, putative, expressed
LOC_Os09g32240	OsFBX332 - F-box domain containing protein, expressed
LOC_Os09g32250	DNA repair ATPase-related, putative, expressed
LOC_Os09g32260	no apical meristem protein, putative, expressed
LOC_Os09g32270	expressed protein
LOC_Os09g32274	30S ribosomal protein S16, putative, expressed
LOC_Os09g32280	thaumatin, putative, expressed
LOC_Os09g32290	FAD dependent oxidoreductase domain containing protein, expressed
LOC_Os09g32300	KH domain-containing protein, putative, expressed
LOC_Os09g32310	expressed protein
LOC_Os09g32320	growth regulator related protein, putative, expressed
LOC_Os09g32330	expressed protein
LOC_Os09g32340	expressed protein
LOC_Os09g32350	expressed protein
LOC_Os09g32360	gp176, putative, expressed
LOC_Os09g32370	gp176, putative, expressed
LOC_Os09g32400	conserved hypothetical protein
LOC_Os09g32410	OsFBX333 - F-box domain containing protein, expressed
LOC_Os09g32430	oxidoreductase, putative, expressed
LOC_Os09g32440	endonuclease/exonuclease/phosphatase family domain containing protein, expressed
LOC_Os09g32450	DNA topoisomerase 3 protein, putative, expressed
LOC_Os09g32470	membrane protein, putative, expressed
LOC_Os09g32480	expressed protein
LOC_Os09g32500	60S ribosomal protein L32, putative, expressed
LOC_Os09g32510	BHLH transcription factor, putative, expressed
LOC_Os09g32520	60S ribosomal protein L32, putative, expressed
LOC_Os09g32526	peptidyl-prolyl cis-trans isomerase, FKBP-type, putative, expressed
LOC_Os09g32532	60S ribosomal protein L32, putative, expressed
LOC_Os09g32540	expressed protein
LOC_Os09g32550	glucan endo-1,3-beta-glucosidase precursor, putative, expressed
LOC_Os09g32560	expressed protein
LOC_Os09g32570	alcohol dehydrogenase GroES-like domain containing protein, expressed
LOC_Os09g32580	expressed protein
LOC_Os09g32590	expressed protein
LOC_Os09g32600	OsFBX334 - F-box domain containing protein, expressed
LOC_Os09g32610	expressed protein
LOC_Os09g32620	dehydrogenase, putative, expressed
LOC_Os09g32640	dehydrogenase, putative, expressed
LOC_Os09g32650	leucyl-tRNA synthetase, cytoplasmic, putative, expressed
LOC_Os09g32660	expressed protein
LOC_Os09g32670	UDP-glucuronate 4-epimerase, putative, expressed
LOC_Os09g32680	cyclin, putative, expressed
LOC_Os09g32690	zinc finger, C3HC4 type domain containing protein, expressed
LOC_Os09g32700	expressed protein
LOC_Os09g32710	expressed protein
LOC_Os09g32730	zinc finger, C3HC4 type domain containing protein, expressed
LOC_Os09g32740	ubiquitin carboxyl-terminal hydrolase family protein, expressed
LOC_Os09g32760	acyl-ACP thioesterase, putative, expressed
LOC_Os09g32770	auxin efflux carrier component, putative, expressed
LOC_Os09g32800	peptidase, T1 family, putative, expressed
LOC_Os09g32820	uridine/cytidine kinase-like 1, putative, expressed
LOC_Os09g32830	nucleotide pyrophosphatase/phosphodiesterase, putative, expressed
LOC_Os09g32840	nucleotide pyrophosphatase/phosphodiesterase, putative, expressed
LOC_Os09g32850	expressed protein
LOC_Os09g32860	OsFBX335 - F-box domain containing protein, expressed
LOC_Os09g32870	OsFBX336 - F-box domain containing protein, expressed
LOC_Os09g32890	expressed protein
LOC_Os09g32910	OsFBX337 - F-box domain containing protein, expressed
LOC_Os09g32920	expressed protein
LOC_Os09g32930	retrotransposon protein, putative, SINE subclass, expressed
LOC_Os09g32940	expressed protein
LOC_Os09g32944	OsSPL18 - SBP-box gene family member, expressed
LOC_Os09g32948	OsMADS8 - MADS-box family gene with MIKCc type-box, expressed
LOC_Os09g32952	L-ascorbate oxidase precursor, putative, expressed
LOC_Os09g32956	hypothetical protein
LOC_Os09g32960	expressed protein
LOC_Os09g32964	peroxidase precursor, putative, expressed
LOC_Os09g32968	emp24/gp25L/p24 family protein, putative, expressed
LOC_Os09g32972	MYB protein, putative, expressed
LOC_Os09g32976	ribosomal protein L7Ae, putative, expressed
LOC_Os09g32988	POEI18 - Pollen Ole e I allergen and extensin family protein precursor, expressed
LOC_Os09g32992	expressed protein
LOC_Os09g33450	zinc finger DHHC domain-containing protein, putative, expressed
LOC_Os09g33460	double-stranded RNA binding motif containing protein, expressed
LOC_Os09g33470	mitochondrial carrier protein, putative, expressed
LOC_Os09g33480	DAG protein, chloroplast precursor, putative, expressed
LOC_Os09g33490	no apical meristem protein, putative, expressed
LOC_Os09g33500	transketolase, putative, expressed
LOC_Os09g33510	hydroxyproline-rich glycoprotein family protein, putative, expressed
LOC_Os09g33520	expressed protein
LOC_Os09g33530	expressed protein
LOC_Os09g33540	expressed protein
LOC_Os09g33550	CCT/B-box zinc finger protein, putative, expressed
LOC_Os09g33555	expressed protein
LOC_Os09g33559	proline-rich family protein, putative, expressed
LOC_Os09g33580	BEE 1, putative, expressed
LOC_Os09g33600	ARF GTPase-activating domain-containing protein, putative, expressed
LOC_Os09g33620	Leucine Rich Repeat domain containing protein, expressed
LOC_Os09g33630	protein kinase domain containing protein, expressed
LOC_Os09g33640	expressed protein
LOC_Os09g33650	expressed protein
LOC_Os09g33660	hypothetical protein
LOC_Os09g33670	zinc finger, C3HC4 type domain containing protein, expressed
LOC_Os09g33680	Os9bglu31 - beta-glucosidase, dhurrinase, similar to G. max hydroxyisourate hydrolase, expressed
LOC_Os09g33690	Os9bglu32 - beta-glucosidase homologue, similar to G. max hydroxyisourate hydrolase, expressed
LOC_Os09g33710	Os9bglu33 - beta-glucosidase homologue, similar to G. max hydroxyisourate hydrolase, expressed
LOC_Os09g33720	protein transport protein Sec61, putative, expressed
LOC_Os09g33730	expressed protein
LOC_Os09g33740	Zinc finger, ZZ type domain containing protein, expressed
LOC_Os09g33770	protein transport protein Sec61 subunit alpha isoform 1, putative, expressed
LOC_Os09g33780	expressed protein
LOC_Os09g33790	snRK1-interacting protein 1, putative, expressed
LOC_Os09g33800	arabinogalactan protein, putative, expressed
LOC_Os09g33810	ankyrin repeat domain containing protein, putative, expressed
LOC_Os09g33820	lecithine cholesterol acyltransferase, putative, expressed
LOC_Os09g33830	solute carrier family 35 member F1, putative, expressed
LOC_Os09g33850	osFTL4 FT-Like4 homologous to Flowering Locus T gene; contains Pfam profile PF01161: Phosphatidylethanolamine-binding protein, expressed
LOC_Os09g33860	protein kinase, putative, expressed
LOC_Os09g33870	RNA recognition motif containing protein, putative, expressed
LOC_Os09g33876	expressed protein
LOC_Os09g33882	expressed protein
LOC_Os09g33890	expressed protein
LOC_Os09g33900	FAD dependent oxidoreductase domain containing protein, expressed
LOC_Os09g33910	CAMK_CAMK_like.39 - CAMK includes calcium/calmodulin depedent protein kinases, expressed
LOC_Os09g33920	expressed protein
LOC_Os09g33930	farnesyltransferase/geranylgeranyltransferase type-1 subunitalpha, putative, expressed
LOC_Os09g33940	expressed protein
LOC_Os09g33950	ferredoxin 1-like isoform 1, putative, expressed
LOC_Os09g33960	expressed protein
LOC_Os09g33970	expressed protein
LOC_Os09g33980	bromodomain protein 103, putative, expressed
LOC_Os09g33986	peptidase, T1 family, putative, expressed
LOC_Os09g33992	expressed protein
LOC_Os09g34000	expressed protein
LOC_Os09g34010	expressed protein
LOC_Os09g34020	expressed protein
LOC_Os09g34040	TBC domain containing protein, expressed
LOC_Os09g34050	expressed protein
LOC_Os09g34060	transcription factor RF2a, putative, expressed
LOC_Os09g34070	RNA recognition motif containing protein, expressed
LOC_Os09g34075	expressed protein
LOC_Os09g34080	expressed protein
LOC_Os09g34090	sterol-4-alpha-carboxylate 3-dehydrogenase, decarboxylating, putative, expressed
LOC_Os09g34100	metallo-beta-lactamase family protein, putative, expressed
LOC_Os09g34110	expressed protein
LOC_Os09g34120	expressed protein
LOC_Os09g34130	GRAM domain containing protein, expressed
LOC_Os09g34140	expressed protein
LOC_Os09g34150	NBS-LRR disease resistance protein, putative, expressed
LOC_Os09g34160	resistance protein, putative, expressed
LOC_Os09g34170	expressed protein
LOC_Os09g34180	formin, putative, expressed
LOC_Os09g34190	acyl-coenzyme A thioesterase 10, mitochondrial precursor, putative, expressed
LOC_Os09g34200	OsFBX338 - F-box domain containing protein, expressed
LOC_Os09g34214	UDP-glucoronosyl and UDP-glucosyl transferase domain containing protein, expressed
LOC_Os09g34230	UDP-glucoronosyl/UDP-glucosyl transferase, putative, expressed
LOC_Os09g34240	expressed protein
LOC_Os09g34250	UDP-glucoronosyl and UDP-glucosyl transferase domain containing protein, expressed
LOC_Os09g34260	expressed protein
LOC_Os09g34270	UDP-glucoronosyl and UDP-glucosyl transferase domain containing protein, expressed
LOC_Os09g34280	ankyrin repeat-containing protein, putative, expressed
LOC_Os09g34290	transposon protein, putative, CACTA, En/Spm sub-class, expressed
LOC_Os09g34300	Inositol 1, 3, 4-trisphosphate 5/6-kinase, putative, expressed
LOC_Os09g34310	expressed protein
LOC_Os09g34320	expressed protein
LOC_Os09g34330	helix-loop-helix DNA-binding domain containing protein, expressed
LOC_Os09g34340	expressed protein
LOC_Os09g34847	expressed protein
LOC_Os09g34860	hydrolase, alpha/beta fold family domain containing protein, expressed
LOC_Os09g34870	pentatricopeptide, putative, expressed
LOC_Os09g34880	basic region leucine zipper domain containing protein, expressed
LOC_Os09g34890	expressed protein
LOC_Os09g34900	bile acid sodium symporter family protein, putative, expressed
LOC_Os09g34910	DEAD-box ATP-dependent RNA helicase 7, putative, expressed
LOC_Os09g34920	glycosyl hydrolase family 29, putative, expressed
LOC_Os09g34930	3-ketoacyl-CoA synthase precursor, putative, expressed
LOC_Os09g34940	expressed protein
LOC_Os09g34950	TCP family transcription factor, putative, expressed
LOC_Os09g34960	hydroxymethylglutaryl-CoA synthase, putative, expressed
LOC_Os09g34970	arsenical pump-driving ATPase, putative, expressed
LOC_Os09g34980	zinc knuckle family protein, expressed
LOC_Os09g34985	expressed protein
LOC_Os09g34990	uncharacterized membrane protein, putative, expressed
LOC_Os09g35000	flap endonuclease, putative, expressed
LOC_Os09g35010	dehydration-responsive element-binding protein, putative, expressed
LOC_Os09g35020	AP2 domain containing protein, expressed
LOC_Os09g35030	dehydration-responsive element-binding protein, putative, expressed
LOC_Os09g35540	expressed protein
LOC_Os09g35550	hypothetical protein
LOC_Os09g35560	expressed protein
LOC_Os09g35570	expressed protein
LOC_Os09g35580	expressed protein
LOC_Os09g35590	expressed protein
LOC_Os09g35600	MATE domain containing protein, expressed
LOC_Os09g35630	BAG domain-containing protein, putative, expressed
LOC_Os09g35640	expressed protein
LOC_Os09g35670	expressed protein
LOC_Os09g35680	OsFBX339 - F-box domain containing protein, expressed
LOC_Os09g35690	zinc RING finger protein, putative, expressed
LOC_Os09g35700	LTPL45 - Protease inhibitor/seed storage/LTP family protein precursor, expressed
LOC_Os09g35710	UBX domain-containing protein, putative, expressed
LOC_Os09g35720	generative cell specific-1, putative, expressed
LOC_Os09g35730	OsRhmbd16 - Putative Rhomboid homologue, expressed
LOC_Os09g35740	expressed protein
LOC_Os09g35750	expressed protein
LOC_Os09g35760	homeobox and START domains containing protein, putative, expressed
LOC_Os09g35780	BAP2, putative, expressed
LOC_Os09g35790	HSF-type DNA-binding domain containing protein, expressed
LOC_Os09g35800	UDP-glucose 4-epimerase, putative, expressed
LOC_Os09g35940	cytochrome P450, putative, expressed
LOC_Os09g35960	TBC domain containing protein, expressed
LOC_Os09g35970	6-phosphogluconolactonase, putative, expressed
LOC_Os09g35980	expressed protein
LOC_Os09g35990	expressed protein
LOC_Os09g36000	expressed protein
LOC_Os09g36010	expressed protein
LOC_Os09g36030	4-hydroxy-2-oxovalerate aldolase, putative, expressed
LOC_Os09g36040	rhodanese-like domain containing protein, putative, expressed
LOC_Os09g36050	expressed protein
LOC_Os09g36060	endoglucanase, putative, expressed
LOC_Os09g36070	cytochrome P450, putative, expressed
LOC_Os09g36080	cytochrome P450, putative, expressed
LOC_Os09g36090	plus-3 domain containing protein, expressed
LOC_Os09g36100	expressed protein
LOC_Os09g36110	OsSub59 - Putative Subtilisin homologue, expressed
LOC_Os09g36120	expressed protein
LOC_Os09g36130	expressed protein
LOC_Os09g36140	RNA recognition motif 2 domain containing protein, expressed
LOC_Os09g36150	retrotransposon protein, putative, unclassified, expressed
LOC_Os09g36160	LRP1, putative, expressed
LOC_Os09g36190	glycosyl transferase family 8, putative, expressed
LOC_Os09g36210	harpin-induced protein 1 domain containing protein, expressed
LOC_Os09g36220	response regulator receiver domain containing protein, expressed
LOC_Os09g36230	PPR repeat containing protein, expressed
LOC_Os09g36240	deoxyribodipyrimidine photolyase family protein, expressed
LOC_Os09g36244	expressed protein
LOC_Os09g36250	MYB family transcription factor, putative, expressed
LOC_Os09g36260	expressed protein
LOC_Os09g36270	pantothenate kinase, putative, expressed
LOC_Os09g36280	glycosyl hydrolases family 17, putative, expressed
LOC_Os09g36290	Ser/Thr protein phosphatase family protein, putative, expressed
LOC_Os09g36300	OsLonP4 - Putative Lon protease homologue, expressed
LOC_Os09g36310	expressed protein
LOC_Os09g36320	tyrosine protein kinase domain containing protein, putative, expressed
LOC_Os09g36330	expressed protein
LOC_Os09g36340	HVA22, putative, expressed
LOC_Os09g36350	endoglucanase, putative, expressed
LOC_Os09g36360	protein of unknown function containing protein, expressed
LOC_Os09g36370	ER lumen protein retaining receptor containing protein, expressed
LOC_Os09g36380	expressed protein
LOC_Os09g36400	expressed protein
LOC_Os09g36420	hsp90 protein, expressed
LOC_Os09g36430	expressed protein
LOC_Os09g36440	transcription initiation factor IIB, putative, expressed
LOC_Os09g36450	triosephosphate isomerase, chloroplast precursor, putative, expressed
LOC_Os09g36460	zinc RING finger protein, putative, expressed
LOC_Os09g36480	XAP5 family protein, putative, expressed
LOC_Os09g36490	expressed protein
LOC_Os09g36500	zinc finger, C3HC4 type domain containing protein, expressed
LOC_Os09g36510	expressed protein
LOC_Os09g36520	ki1 protein, putative, expressed
LOC_Os09g36530	endonuclease/exonuclease/phosphatase family protein, putative, expressed
LOC_Os09g36550	armadillo/beta-catenin repeat family protein, putative, expressed
LOC_Os09g36580	thaumatin, putative, expressed
LOC_Os09g36600	nodulin, putative, expressed
LOC_Os09g36619	expressed protein
LOC_Os09g36630	expressed protein
LOC_Os09g36640	expressed protein
LOC_Os09g36650	expressed protein
LOC_Os09g36660	expressed protein
LOC_Os09g36670	peptidyl-prolyl cis-trans isomerase, putative, expressed
LOC_Os09g36680	ribonuclease T2 family domain containing protein, expressed
LOC_Os09g36690	expressed protein
LOC_Os09g36700	ribonuclease T2 family domain containing protein, expressed
LOC_Os09g36730	MYB family transcription factor, putative, expressed
LOC_Os09g36735	expressed protein
LOC_Os09g36740	tetratricopeptide repeat domain containing protein, expressed
LOC_Os09g36750	L-ascorbate peroxidase 4, putative, expressed
LOC_Os09g36760	DUF630/DUF632 domains containing protein, putative, expressed
LOC_Os09g36770	NTMC2Type1.2 protein, putative, expressed
LOC_Os09g36800	3-dehydroquinate synthase, putative, expressed
LOC_Os09g36830	Skp1 family, dimerisation domain containing protein, expressed
LOC_Os09g36910	bZIP transcription factor domain containing protein, expressed
LOC_Os09g36940	plastocyanin-like domain containing protein, putative, expressed
LOC_Os09g36950	expressed protein
LOC_Os09g36960	expressed protein
LOC_Os09g36970	expressed protein
LOC_Os09g36976	trafficking protein particle complex subunit, putative, expressed
LOC_Os09g36982	protein of unknown function DUF1279 domain containing protein, expressed
LOC_Os09g36990	expressed protein
LOC_Os09g37000	26S proteasome non-ATPase regulatory subunit 3, putative, expressed
LOC_Os09g37006	protein of unknown function domain containing protein, expressed
LOC_Os09g37012	eukaryotic aspartyl protease domain containing protein, expressed
LOC_Os09g37070	pentatricopeptide, putative, expressed
