# Supplementary material for: High-resolution quantitative trait locus mapping for rice grain quality traits using genotyping by sequencing
Source: Front Plant Sci. 2023 Jan 12;13:1050882. doi: 10.3389/fpls.2022.1050882 (PMC9878556; doi:10.3389/fpls.2022.1050882)
Supplement: Supplementary file 5 [file Table_5.xlsx]

## Sheet: Sheet1
Supplemental Table 5. Candidate genes with potential role in rice grain quality traits
Description	Gene ID	Arabidopsis hit	QTL	Reference
Basic region leucine zipper domain containing protein, expressed	LOC_Os09g34880	AT4G38900	DC-3	Wang et al., 2013
Glycosyl hydrolase, putative, expressed	LOC_Os07g19040	AT5G24090	TP-1
	LOC_Os07g23850		TP-1
	LOC_Os07g23880	AT3G23640	TP-1
	LOC_Os07g23944		TP-1
Glycosyl transferase, group 1 domain containing protein, expressed	LOC_Os07g16960	AT3G45100	TP-1
NAD dependent epimerase/dehydratase family protein	LOC_Os07g11110	AT3G63140	DC-2	Teng et al., 2019
No apical meristem protein, expressed	LOC_Os07g09740	AT3G04070	CA-3	Zhang et al., 2019
	LOC_Os07g09830		CA-3
	LOC_Os07g09860		CA-3
	LOC_Os07g17180		TP-1
	LOC_Os09g33490	AT2G33480	DC-3
Pentatricopeptide containing protein, putative, expressed	LOC_Os07g06960	AT3G62890	TP-4	Hao et al., 2019; Wu et al., 2019
	LOC_Os07g11280	AT2G41720	DC-2
	LOC_Os07g15570	AT2G46050	TP-1
	LOC_Os07g19400	AT1G71490	TP-1
	LOC_Os07g25500	AT3G57430	TP-1
	LOC_Os09g34870	AT2G36980	DC-3
Protein transport protein Sec61, putative, expressed	LOC_Os09g33720	AT1G78720	DC-3	Wang et al., 2016
	LOC_Os09g33770		DC-3
Starch synthase, putative, expressed	LOC_Os07g22930	AT1G32900	TP-1	Sano et al., 1985; Gao et al., 2003; Nakamura et al., 2005; Gao et al., 2011
UDP-glucoronosyl and UDP-glucosyl transferase domain containing protein, expressed	LOC_Os09g34214	AT2G43820	DC-3
	LOC_Os09g34230	AT2G43840	DC-3
	LOC_Os09g34250		DC-3
	LOC_Os09g34270	AT1G05680	DC-3
UDP-glucuronate 4-epimerase, putative, expressed	LOC_Os09g32670	AT3G23820	DC-3
	LOC_Os09g35800	AT1G12780	DC-3
